# Supplementary material for: Coronavirus fear of contagion and compliance with social distancing measures: evidence for a sample of a Spanish university community
Source: PeerJ. 2023 Mar 1;11:e14771. doi: 10.7717/peerj.14771 (PMC9985414; doi:10.7717/peerj.14771)
Supplement: Supplemental Information 1 [file peerj-11-14771-s001.xlsx]

## Sheet: DECON - Changes lifestyle
response ID	Shipping date	Last page	initial language	Start date	Date of last action	1. Gender: [Male.]	1. Gender: [Female.]	1. Gender: [Other]	2. Age (in years):	3. Population group to which they belong: [Student: Degree.]	3. Population group to which it belongs: [Student: Postgraduate.]	3. Population group to which you belong: [Student: Senior.]	3. Population group to which they belong: [Personnel who work at UC (Administration and Services Personnel and Teaching and Research Personnel).]	5. Marital status: [Single. ]	5. Marital status: [Married or domestic partner.]	5. Marital status: [Widower. ]	5. Marital status: [Separated or Divorced. ]	6. Are you responsible for the care of ascendants or descendants?	7. How many people reside in the household? Include yourself. [1]	7. How many people reside in the household? Include yourself. [two]	7. How many people reside in the household? Include yourself. [3]	7. How many people reside in the household? Include yourself. [4]	7. How many people reside in the household? Include yourself. [5]	7. How many people reside in the household? Include yourself. [More than 5]	8. To prevent contagion, which of these daily behaviors are you adopting? Check the ones that apply to you: [I wash my hands very often.]	8. To prevent contagion, which of these daily behaviors are you adopting? Indicate those that apply in your case: [I always wear a mask.]	8. To prevent contagion, which of these daily behaviors are you adopting? Check the ones that apply to you: [I try to keep a safe distance from people.]	8. To prevent contagion, which of these daily behaviors are you adopting? Check the ones that apply to you: [I go to supermarkets as little as possible.]	8. To prevent contagion, which of these daily behaviors are you adopting? Indicate those that apply in your case: [I no longer stay with non-cohabitants.]	8. To prevent contagion, which of these daily behaviors are you adopting? Indicate the ones that apply in your case: [I do not leave the house except in an emergency.]	8. To prevent contagion, which of these daily behaviors are you adopting? Indicate the ones that apply in your case: [None of the above.]	8. To prevent contagion, which of these daily behaviors are you adopting? Indicate those that apply in your case: [I prefer not to answer.]	8. To prevent contagion, which of these daily behaviors are you adopting? Indicate those that apply in your case: [Other]	9. From Monday to Friday, indicate the reasons why you leave home: [Work.]	9. From Monday to Friday, indicate the reasons why you leave home: [Shopping in supermarkets.]	9. From Monday to Friday, indicate the reasons why you leave home: [Shopping in general.]	9. From Monday to Friday, indicate the reasons why you leave home: [Provision of care for dependent persons.]	9. From Monday to Friday, indicate the reasons why you leave home: [Leisure in outdoor places.]	9. From Monday to Friday, indicate the reasons why you leave home: [Leisure in closed places.]	9. From Monday to Friday, indicate the reasons why you leave the house: [I do not leave the house.]	10. On weekends, indicate the reasons why you leave home: [Work.]	10. On weekends, indicate the reasons why you leave home: [Shopping in supermarkets.]	10. On weekends, indicate the reasons why you leave home: [Shopping in general.]	10. On weekends, indicate the reasons why you leave home: [Provision of care for dependent persons.]	10. On weekends, indicate the reasons why you leave home: [Leisure in outdoor places.]	10. On weekends, indicate the reasons why you leave home: [Leisure in closed places.]	10. On weekends, indicate the reasons why you leave home: [I do not leave home.]	11. Before COVID19, how many times a week did you go to a terrace, bar, restaurant or similar? [0]	11. Before COVID19, how many times a week did you go to a terrace, bar, restaurant or similar? [1]
1	2020-12-14 09:23:43	5	ESPANISH	2020-12-14 09:16:08	2020-12-14 09:23:43	No	Yes		22	No	Yes	No	No	Yes	No	No	No	No	No	No	No	Yes	No	No	Yes	Yes	Yes	Yes	No	No	No	No		Yes	No	No	No	No	Yes	No	No	No	No	No	No	Yes	No	No	No
5	2021-01-15 13:07:34	5	ESPANISH	2021-01-15 13:03:20	2021-01-15 13:07:34	No	Yes		23	Yes	No	No	No	Yes	No	No	No	No	No	No	Yes	No	No	No	Yes	Yes	Yes	No	No	No	No	No		No	No	No	No	Yes	No	No	No	No	No	No	Yes	No	No	No	No
8	2021-01-19 18:19:06	5	ESPANISH	2021-01-19 18:14:10	2021-01-19 18:19:06	Yes	No		45	No	No	No	Yes	No	Yes	No	No	No	No	Yes	No	No	No	No	Yes	Yes	Yes	Yes	No	No	No	No		Yes	Yes	No	No	Yes	No	No	No	Yes	No	No	Yes	No	No	No	No
9	2021-01-19 18:27:11	5	ESPANISH	2021-01-19 18:21:57	2021-01-19 18:27:11	Yes	No		44	No	No	No	Yes	Yes	No	No	No	No	No	No	Yes	No	No	No	Yes	Yes	Yes	No	Yes	No	No	No		Yes	Yes	No	No	No	No	No	No	No	Yes	No	No	No	No	No	Yes
11	2021-01-19 18:24:55	5	ESPANISH	2021-01-19 18:22:17	2021-01-19 18:24:55	Yes	No		35	No	No	No	Yes	Yes	No	No	No	No	Yes	No	No	No	No	No	Yes	Yes	Yes	Yes	Yes	No	No	No		Yes	Yes	No	No	Yes	No	No	No	Yes	No	No	Yes	No	No	No	No
12	2021-01-19 18:28:46	5	ESPANISH	2021-01-19 18:22:30	2021-01-19 18:28:46	No	Yes		19	Yes	No	No	No	Yes	No	No	No	No	No	No	Yes	No	No	No	Yes	Yes	No	Yes	Yes	No	No	No		Yes	No	No	No	No	No	No	No	No	No	No	Yes	No	Yes	No	No
13	2021-01-19 18:27:57	5	ESPANISH	2021-01-19 18:22:31	2021-01-19 18:27:57	No	Yes		19	Yes	No	No	No	No	Yes	No	No	No	No	No	No	Yes	No	No	Yes	Yes	Yes	No	No	No	No	No		No	No	Yes	No	Yes	No	No	No	No	Yes	No	Yes	No	No	No	No
14	2021-01-19 18:27:55	5	ESPANISH	2021-01-19 18:22:34	2021-01-19 18:27:55	No	Yes		19	Yes	No	No	No	Yes	No	No	No	No	No	No	No	Yes	No	No	Yes	Yes	Yes	Yes	No	No	No	No		Yes	No	No	No	No	No	No	Yes	No	No	No	Yes	Yes	No	No	No
15	2021-01-19 18:36:18	5	ESPANISH	2021-01-19 18:22:36	2021-01-19 18:36:18	Yes	No		23	Yes	No	No	No	No	Yes	No	No	No	No	No	No	Yes	No	No	No	Yes	No	No	No	No	No	No	Only maintain contact with a very small group of people who do not live together (3-5 approx.) and always with a mask.	Yes	No	No	No	No	No	No	No	No	No	No	No	No	Yes	No	No
16	2021-01-19 18:26:44	5	ESPANISH	2021-01-19 18:22:37	2021-01-19 18:26:44	No	Yes		20	No	Yes	No	No	Yes	No	No	No	No	No	No	Yes	No	No	No	Yes	Yes	Yes	Yes	No	No	No	No		Yes	No	No	No	Yes	No	No	No	No	No	No	Yes	No	No	No	No
17	2021-01-19 18:26:18	5	ESPANISH	2021-01-19 18:22:39	2021-01-19 18:26:18	Yes	No		45	No	No	No	Yes	No	Yes	No	No	No	No	Yes	No	No	No	No	No	Yes	Yes	Yes	No	No	No	No		Yes	Yes	No	Yes	Yes	No	No	No	Yes	No	No	Yes	No	No	No	No
18	2021-01-19 18:27:01	5	ESPANISH	2021-01-19 18:22:40	2021-01-19 18:27:01	No	Yes		19	Yes	No	No	No	Yes	No	No	No	No	No	No	No	Yes	No	No	Yes	Yes	Yes	Yes	No	No	No	No		No	No	No	No	Yes	No	No	No	No	No	No	Yes	No	No	No	No
19	2021-01-19 18:32:31	5	ESPANISH	2021-01-19 18:22:42	2021-01-19 18:32:31	Yes	No		19	Yes	No	No	No	Yes	No	No	No	No	No	No	No	Yes	No	No	Yes	Yes	Yes	Yes	No	No	No	No		Yes	No	Yes	No	No	No	No	No	No	No	No	No	No	Yes	Yes	No
22	2021-01-19 18:30:03	5	ESPANISH	2021-01-19 18:22:44	2021-01-19 18:30:03	No	Yes		33	No	Yes	No	No	Yes	No	No	No	No	No	No	Yes	No	No	No	Yes	Yes	Yes	Yes	No	No	No	No		No	No	No	No	Yes	Yes	No	No	No	No	No	Yes	Yes	No	No	No
24	2021-01-19 18:28:08	5	ESPANISH	2021-01-19 18:22:47	2021-01-19 18:28:08	No	Yes		21	Yes	No	No	No	Yes	No	No	No	No	No	No	No	No	Yes	No	Yes	Yes	Yes	No	Yes	Yes	No	No		Yes	Yes	No	No	No	No	No	No	No	No	No	No	No	Yes	Yes	No
25	2021-01-19 18:29:59	5	ESPANISH	2021-01-19 18:22:47	2021-01-19 18:29:59	Yes	No		64	No	No	No	Yes	No	Yes	No	No	No	No	No	Yes	No	No	No	Yes	Yes	No	No	No	No	No	No		Yes	Yes	No	No	Yes	No	No	No	No	Yes	No	Yes	No	No	No	No
26	2021-01-19 18:28:08	5	ESPANISH	2021-01-19 18:22:50	2021-01-19 18:28:08	No	Yes		22	Yes	No	No	No	Yes	No	No	No	No	No	No	Yes	No	No	No	Yes	Yes	Yes	No	No	No	No	No		Yes	Yes	Yes	No	Yes	No	No	No	Yes	Yes	No	Yes	Yes	No	No	No
27	2021-01-19 18:27:23	5	ESPANISH	2021-01-19 18:22:54	2021-01-19 18:27:23	No	Yes		23	Yes	No	No	No	Yes	No	No	No	No	No	No	No	No	Yes	No	Yes	Yes	No	Yes	No	No	No	No		Yes	Yes	No	No	No	No	No	No	Yes	No	No	Yes	No	No	No	No
29	2021-01-19 18:28:00	5	ESPANISH	2021-01-19 18:22:58	2021-01-19 18:28:00	Yes	No		18	Yes	No	No	No	Yes	No	No	No	No	No	No	No	Yes	No	No	No	Yes	Yes	No	No	No	No	No		Yes	Yes	No	No	No	No	No	No	Yes	No	No	Yes	Yes	No	No	Yes
30	2021-01-19 18:33:09	5	ESPANISH	2021-01-19 18:23:01	2021-01-19 18:33:09	No	Yes		18	Yes	No	No	No	No	Yes	No	No	No	No	No	No	No	Yes	No	Yes	Yes	Yes	No	No	No	No	No		Yes	Yes	Yes	No	No	No	No	No	No	No	No	No	Yes	No	Yes	No
31	2021-01-19 18:28:01	5	ESPANISH	2021-01-19 18:23:03	2021-01-19 18:28:01	No	Yes		20	Yes	No	No	No	Yes	No	No	No	No	No	No	No	Yes	No	No	Yes	Yes	Yes	Yes	No	No	No	No		Yes	Yes	No	No	No	No	No	No	Yes	No	No	Yes	No	No	Yes	No
32	2021-01-19 18:28:03	5	ESPANISH	2021-01-19 18:23:05	2021-01-19 18:28:03	No	Yes		19	Yes	No	No	No	Yes	No	No	No	No	No	No	No	Yes	No	No	Yes	Yes	Yes	No	Yes	No	No	No		No	Yes	No	No	No	No	No	No	Yes	No	No	No	No	No	Yes	No
34	2021-01-19 18:29:41	5	ESPANISH	2021-01-19 18:23:06	2021-01-19 18:29:41	Yes	No		37	No	Yes	No	No	Yes	No	No	No	No	No	No	Yes	No	No	No	Yes	Yes	Yes	No	No	Yes	No	No		Yes	Yes	No	No	No	No	No	No	Yes	No	No	No	No	No	Yes	No
38	2021-01-19 18:27:47	5	ESPANISH	2021-01-19 18:23:08	2021-01-19 18:27:46	No	Yes		21	Yes	No	No	No	Yes	No	No	No	No	No	No	No	Yes	No	No	Yes	Yes	Yes	No	No	Yes	No	No		No	No	No	No	No	Yes	No	No	No	No	No	Yes	No	No	No	No
39	2021-01-19 18:34:02	5	ESPANISH	2021-01-19 18:23:09	2021-01-19 18:34:02	Yes	No		20	Yes	No	No	No	Yes	No	No	No	No	No	No	No	Yes	No	No	No	No	Yes	Yes	No	No	No	No		No	No	No	No	Yes	Yes	No	No	No	No	No	Yes	Yes	No	No	No
40	2021-01-19 18:30:32	5	ESPANISH	2021-01-19 18:23:09	2021-01-19 18:30:32	No	Yes		20	Yes	No	No	No	Yes	No	No	No	No	No	No	No	Yes	No	No	Yes	Yes	Yes	No	No	No	No	No		No	No	Yes	No	No	No	No	No	No	Yes	No	No	No	No	No	Yes
41	2021-01-19 18:30:19	5	ESPANISH	2021-01-19 18:23:12	2021-01-19 18:30:19	Yes	No		40	No	No	No	Yes	Yes	No	No	No	No	Yes	No	No	No	No	No	Yes	Yes	Yes	No	No	No	No	No	I tend to telecommute except for face-to-face teaching	Yes	Yes	Yes	No	Yes	No	No	Yes	Yes	Yes	No	Yes	No	No	No	Yes
42	2021-01-19 18:31:27	5	ESPANISH	2021-01-19 18:23:15	2021-01-19 18:31:27	Yes	No		22	Yes	No	No	No	Yes	No	No	No	No	No	No	No	Yes	No	No	Yes	Yes	Yes	Yes	No	No	No	No		No	No	No	No	No	No	Yes	No	Yes	No	No	No	No	No	No	Yes
43	2021-01-19 18:30:27	5	ESPANISH	2021-01-19 18:23:15	2021-01-19 18:30:27	No	Yes		18	Yes	No	No	No	Yes	No	No	No	No	No	No	Yes	No	No	No	Yes	Yes	Yes	No	No	No	No	No		Yes	Yes	No	No	Yes	No	No	No	Yes	No	No	Yes	No	No	No	No
45	2021-01-19 18:31:31	5	ESPANISH	2021-01-19 18:23:29	2021-01-19 18:31:31	No	Yes		21	Yes	No	No	No	Yes	No	No	No	No	No	No	No	Yes	No	No	Yes	Yes	Yes	No	No	No	No	No		Yes	Yes	No	No	Yes	No	No	No	Yes	Yes	No	Yes	No	No	No	No
46	2021-01-19 18:29:54	5	ESPANISH	2021-01-19 18:23:29	2021-01-19 18:29:54	No	Yes		21	Yes	No	No	No	Yes	No	No	No	No	No	Yes	No	No	No	No	Yes	Yes	Yes	Yes	No	No	No	No		Yes	Yes	Yes	No	Yes	No	No	No	No	No	No	Yes	No	No	Yes	No
47	2021-01-19 18:31:51	5	ESPANISH	2021-01-19 18:23:32	2021-01-19 18:31:51	No	Yes		67	No	No	No	Yes	No	No	Yes	No	No	Yes	No	No	No	No	No	Yes	Yes	No	No	No	No	No	No		No	Yes	Yes	No	No	No	No	No	No	No	No	Yes	No	No	No	No
48	2021-01-19 18:30:53	5	ESPANISH	2021-01-19 18:23:34	2021-01-19 18:30:53	Yes	No		18	Yes	No	No	No	Yes	No	No	No	No	No	No	No	No	Yes	No	Yes	Yes	Yes	No	Yes	Yes	No	No		Yes	No	No	No	No	No	No	No	No	No	No	No	No	Yes	No	No
49	2021-01-19 18:29:03	5	ESPANISH	2021-01-19 18:23:38	2021-01-19 18:29:03	Yes	No		23	No	No	No	Yes	Yes	No	No	No	No	No	No	Yes	No	No	No	Yes	Yes	Yes	Yes	No	No	No	No		Yes	Yes	Yes	No	Yes	No	No	No	Yes	Yes	No	Yes	No	No	No	No
50	2021-01-19 18:29:33	5	ESPANISH	2021-01-19 18:23:42	2021-01-19 18:29:33	No	Yes		21	Yes	No	No	No	Yes	No	No	No	No	No	No	No	Yes	No	No	Yes	Yes	Yes	No	No	No	No	No	I reduce my contacts with people who do not live together	Yes	Yes	No	No	Yes	No	No	No	Yes	No	No	Yes	No	No	No	No
51	2021-01-19 18:29:23	5	ESPANISH	2021-01-19 18:23:44	2021-01-19 18:29:23	No	Yes		23	Yes	No	No	No	Yes	No	No	No	No	No	No	Yes	No	No	No	Yes	Yes	Yes	Yes	No	No	No	No		Yes	No	No	No	No	No	No	Yes	No	No	No	No	No	No	No	No
52	2021-01-19 18:28:27	5	ESPANISH	2021-01-19 18:23:45	2021-01-19 18:28:27	Yes	No		26	Yes	No	No	No	Yes	No	No	No	No	No	No	No	Yes	No	No	No	Yes	Yes	No	No	No	No	No		Yes	No	Yes	No	Yes	No	No	No	No	Yes	No	Yes	No	No	No	No
53	2021-01-19 18:29:08	5	ESPANISH	2021-01-19 18:23:46	2021-01-19 18:29:08	Yes	No		46	No	No	No	Yes	No	Yes	No	No	No	No	No	Yes	No	No	No	No	No	No	No	No	No	Yes	No		Yes	Yes	No	No	No	No	No	No	Yes	Yes	No	Yes	No	No	No	No
55	2021-01-19 18:30:07	5	ESPANISH	2021-01-19 18:23:58	2021-01-19 18:30:07	No	Yes		18	Yes	No	No	No	Yes	No	No	No	No	No	No	No	Yes	No	No	No	Yes	Yes	Yes	Yes	No	No	No		No	No	No	No	Yes	No	No	No	No	No	No	Yes	No	No	No	No
56	2021-01-19 18:29:08	5	ESPANISH	2021-01-19 18:24:00	2021-01-19 18:29:08	No	Yes		34	No	No	No	Yes	Yes	No	No	No	No	Yes	No	No	No	No	No	Yes	Yes	Yes	No	Yes	No	No	No		Yes	No	Yes	No	No	No	No	No	Yes	Yes	No	Yes	No	No	No	No
57	2021-01-19 18:29:36	5	ESPANISH	2021-01-19 18:24:02	2021-01-19 18:29:36	No	Yes		42	No	No	No	Yes	No	Yes	No	No	Yes	No	No	No	Yes	No	No	No	Yes	Yes	Yes	No	No	No	No		Yes	Yes	Yes	No	No	No	No	No	Yes	Yes	No	No	No	No	No	No
58	2021-01-19 18:30:13	5	ESPANISH	2021-01-19 18:24:03	2021-01-19 18:30:13	Yes	No		22	Yes	No	No	No	Yes	No	No	No	No	No	Yes	No	No	No	No	Yes	Yes	Yes	No	No	Yes	No	No		Yes	No	No	No	Yes	Yes	No	No	No	No	No	Yes	Yes	No	No	No
61	2021-01-19 18:32:07	5	ESPANISH	2021-01-19 18:24:11	2021-01-19 18:32:07	No	Yes		22	Yes	No	No	No	Yes	No	No	No	No	No	No	Yes	No	No	No	No	Yes	Yes	No	No	No	No	No		No	Yes	No	No	Yes	No	No	No	Yes	No	No	Yes	No	No	No	No
62	2021-01-19 18:29:01	5	ESPANISH	2021-01-19 18:24:12	2021-01-19 18:29:01	Yes	No		21	Yes	No	No	No	Yes	No	No	No	No	No	No	No	Yes	No	No	Yes	Yes	Yes	No	No	No	No	No		Yes	Yes	No	No	No	No	No	Yes	No	No	No	Yes	No	No	No	No
63	2021-01-19 18:32:43	5	ESPANISH	2021-01-19 18:24:12	2021-01-19 18:32:43	Yes	No		24	Yes	No	No	No	Yes	No	No	No	No	No	Yes	No	No	No	No	Yes	Yes	Yes	No	Yes	No	No	No		Yes	Yes	No	No	Yes	No	No	No	Yes	No	No	Yes	No	No	No	No
64	2021-01-19 18:31:02	5	ESPANISH	2021-01-19 18:24:14	2021-01-19 18:31:02	No	Yes		47	No	No	No	Yes	No	Yes	No	No	Yes	No	No	No	Yes	No	No	No	Yes	No	No	No	No	No	No		Yes	No	Yes	Yes	Yes	No	No	No	No	Yes	Yes	Yes	Yes	No	No	No
65	2021-01-19 18:29:17	5	ESPANISH	2021-01-19 18:24:14	2021-01-19 18:29:17	Yes	No		18	Yes	No	No	No	Yes	No	No	No	No	No	Yes	No	No	No	No	Yes	Yes	No	No	No	No	No	No		No	Yes	No	No	No	Yes	No	No	Yes	No	No	No	No	No	No	No
66	2021-01-19 18:30:19	5	ESPANISH	2021-01-19 18:24:36	2021-01-19 18:30:19	Yes	No		20	Yes	No	No	No	Yes	No	No	No	No	Yes	No	No	No	No	No	Yes	No	No	No	No	No	No	No		No	Yes	Yes	No	Yes	Yes	No	No	Yes	Yes	No	Yes	Yes	No	No	No
67	2021-01-19 18:30:18	5	ESPANISH	2021-01-19 18:24:41	2021-01-19 18:30:18	Yes	No		19	Yes	No	No	No	No	Yes	No	No	No	Yes	No	No	No	No	No	No	Yes	Yes	No	No	No	No	No		Yes	Yes	No	No	No	No	No	Yes	Yes	Yes	No	Yes	No	No	No	No
68	2021-01-19 18:34:54	5	ESPANISH	2021-01-19 18:24:52	2021-01-19 18:34:54	Yes	No		19	Yes	No	No	No	Yes	No	No	No	No	No	No	Yes	No	No	No	Yes	Yes	Yes	No	No	No	No	No		No	Yes	No	No	Yes	No	No	No	No	Yes	No	Yes	No	No	No	No
69	2021-01-19 18:30:30	5	ESPANISH	2021-01-19 18:25:03	2021-01-19 18:30:30	Yes	No		30	No	No	No	Yes	Yes	No	No	No	No	Yes	No	No	No	No	No	Yes	Yes	Yes	No	Yes	No	No	No		Yes	Yes	Yes	No	No	No	No	No	Yes	Yes	No	Yes	No	No	No	No
70	2021-01-19 18:29:20	5	ESPANISH	2021-01-19 18:25:09	2021-01-19 18:29:20	No	Yes		20	Yes	No	No	No	Yes	No	No	No	No	No	No	No	No	Yes	No	Yes	Yes	No	No	No	No	No	No		No	No	No	No	Yes	Yes	No	No	No	No	No	Yes	Yes	No	No	No
71	2021-01-19 18:30:40	5	ESPANISH	2021-01-19 18:25:12	2021-01-19 18:30:40	Yes	No		22	Yes	No	No	No	Yes	No	No	No	No	No	No	Yes	No	No	No	Yes	Yes	Yes	Yes	No	No	No	No		No	Yes	No	No	No	No	No	No	No	No	No	No	No	Yes	No	Yes
72	2021-01-19 18:29:59	5	ESPANISH	2021-01-19 18:25:17	2021-01-19 18:29:59	No	Yes		41	No	No	No	Yes	No	Yes	No	No	Yes	No	No	Yes	No	No	No	Yes	Yes	Yes	Yes	Yes	Yes	No	No		Yes	No	No	No	No	No	No	No	No	No	No	No	No	Yes	No	Yes
73	2021-01-19 18:32:09	5	ESPANISH	2021-01-19 18:25:18	2021-01-19 18:32:09	Yes	No		19	Yes	No	No	No	Yes	No	No	No	No	No	No	No	Yes	No	No	Yes	Yes	Yes	Yes	No	No	No	No		Yes	No	Yes	No	No	No	No	No	No	Yes	No	No	No	No	No	Yes
74	2021-01-19 18:28:54	5	ESPANISH	2021-01-19 18:25:29	2021-01-19 18:28:54	Yes	No		45	No	No	No	Yes	No	Yes	No	No	No	No	No	Yes	No	No	No	Yes	Yes	Yes	No	No	No	No	No		Yes	Yes	Yes	No	Yes	No	No	No	Yes	Yes	No	Yes	No	No	No	No
75	2021-01-19 18:35:27	5	ESPANISH	2021-01-19 18:25:37	2021-01-19 18:35:27	No	Yes		19	Yes	No	No	No	Yes	No	No	No	No	No	No	No	Yes	No	No	No	Yes	Yes	Yes	No	Yes	No	No		Yes	No	No	No	No	No	No	No	No	No	No	No	No	Yes	No	Yes
76	2021-01-19 18:31:20	5	ESPANISH	2021-01-19 18:25:38	2021-01-19 18:31:20	No	Yes		36	No	No	No	Yes	No	Yes	No	No	No	No	Yes	No	No	No	No	Yes	Yes	Yes	Yes	Yes	Yes	No	No		Yes	No	Yes	No	No	No	No	No	No	No	No	Yes	No	No	Yes	No
77	2021-01-19 18:32:16	5	ESPANISH	2021-01-19 18:25:42	2021-01-19 18:32:16	No	Yes		20	Yes	No	No	No	Yes	No	No	No	No	No	No	No	Yes	No	No	Yes	Yes	Yes	Yes	No	No	No	No		No	No	Yes	No	No	No	No	No	No	No	No	No	No	Yes	No	Yes
78	2021-01-19 18:31:21	5	ESPANISH	2021-01-19 18:25:45	2021-01-19 18:31:21	Yes	No		20	Yes	No	No	No	Yes	No	No	No	No	No	No	Yes	No	No	No	Yes	Yes	No	No	No	No	No	No		Yes	No	Yes	No	Yes	No	No	No	No	Yes	No	Yes	No	No	No	No
79	2021-01-19 18:31:52	5	ESPANISH	2021-01-19 18:25:47	2021-01-19 18:31:52	No	Yes		42	No	No	No	Yes	No	Yes	No	No	Yes	No	No	Yes	No	No	No	Yes	Yes	Yes	Yes	Yes	Yes	No	No		Yes	Yes	No	No	No	No	No	No	No	No	No	No	No	Yes	No	Yes
80	2021-01-19 18:31:18	5	ESPANISH	2021-01-19 18:26:11	2021-01-19 18:31:18	Yes	No		45	No	No	No	Yes	No	Yes	No	No	Yes	No	No	No	Yes	No	No	Yes	Yes	Yes	No	No	No	No	No		Yes	Yes	No	No	Yes	No	No	No	Yes	Yes	No	Yes	No	No	No	No
81	2021-01-19 18:35:15	5	ESPANISH	2021-01-19 18:26:22	2021-01-19 18:35:15	Yes	No		42	No	No	No	Yes	No	Yes	No	No	Yes	No	No	No	Yes	No	No	No	No	No	No	No	No	No	No	I wash my hands more than before	Yes	Yes	No	No	No	No	No	No	Yes	No	No	Yes	Yes	No	No	No
82	2021-01-19 18:31:22	5	ESPANISH	2021-01-19 18:26:45	2021-01-19 18:31:22	No	Yes		twenty.	Yes	No	No	No	No	Yes	No	No	No	No	No	No	No	Yes	No	No	Yes	Yes	Yes	No	No	No	No		Yes	No	No	No	Yes	No	No	Yes	No	No	No	Yes	Yes	No	No	No
83	2021-01-19 18:32:56	5	ESPANISH	2021-01-19 18:27:08	2021-01-19 18:32:56	No	Yes		38	No	No	No	Yes	Yes	No	No	No	No	Yes	No	No	No	No	No	Yes	No	No	Yes	No	No	No	No		No	No	No	No	Yes	No	No	No	Yes	No	No	Yes	No	No	No	No
84	2021-01-19 18:32:26	5	ESPANISH	2021-01-19 18:27:13	2021-01-19 18:32:26	No	Yes		19	Yes	No	No	No	Yes	No	No	No	No	No	No	No	Yes	No	No	No	Yes	Yes	Yes	No	No	No	No		Yes	No	No	No	No	No	No	No	No	No	No	Yes	No	No	No	Yes
85	2021-01-19 18:32:50	5	ESPANISH	2021-01-19 18:27:41	2021-01-19 18:32:50	Yes	No		20	Yes	No	No	No	Yes	No	No	No	No	No	No	No	No	Yes	No	Yes	Yes	Yes	Yes	Yes	No	No	No		Yes	No	Yes	No	No	No	No	No	No	No	No	Yes	No	No	No	No
86	2021-01-19 18:30:44	5	ESPANISH	2021-01-19 18:27:42	2021-01-19 18:30:44	No	Yes		19	Yes	No	No	No	Yes	No	No	No	No	No	No	Yes	No	No	No	Yes	Yes	No	Yes	No	No	No	No		Yes	No	No	No	Yes	No	No	No	No	Yes	No	Yes	No	No	No	No
87	2021-01-19 18:34:41	5	ESPANISH	2021-01-19 18:27:50	2021-01-19 18:34:41	No	Yes		32	No	No	No	Yes	Yes	No	No	No	No	No	No	Yes	No	No	No	Yes	Yes	Yes	Yes	Yes	Yes	No	No		Yes	No	No	No	No	No	No	No	No	No	No	Yes	No	No	No	No
88	2021-01-19 18:34:37	5	ESPANISH	2021-01-19 18:27:52	2021-01-19 18:34:37	No	Yes		18	Yes	No	No	No	No	Yes	No	No	No	No	No	No	Yes	No	No	Yes	Yes	Yes	Yes	Yes	Yes	No	No		No	No	No	No	No	No	Yes	No	No	No	No	No	No	Yes	No	No
89	2021-01-19 18:31:46	5	ESPANISH	2021-01-19 18:27:54	2021-01-19 18:31:46	No	Yes		23	No	Yes	No	No	Yes	No	No	No	No	No	No	No	Yes	No	No	Yes	Yes	Yes	No	No	No	No	No		No	Yes	Yes	No	No	No	No	No	Yes	Yes	No	No	No	No	No	No
90	2021-01-19 18:33:10	5	ESPANISH	2021-01-19 18:28:10	2021-01-19 18:33:10	Yes	No		54	No	No	No	Yes	No	Yes	No	No	Yes	No	No	No	No	Yes	No	No	Yes	Yes	No	No	No	No	No		Yes	Yes	Yes	No	Yes	No	No	Yes	Yes	Yes	No	Yes	No	No	No	No
91	2021-01-19 18:34:54	5	ESPANISH	2021-01-19 18:28:14	2021-01-19 18:34:54	Yes	No		46	No	No	No	Yes	No	Yes	No	No	Yes	No	No	No	Yes	No	No	Yes	Yes	Yes	Yes	No	No	No	No		Yes	No	No	No	No	No	No	No	No	No	No	Yes	No	No	No	Yes
92	2021-01-19 18:35:35	5	ESPANISH	2021-01-19 18:28:16	2021-01-19 18:35:35	Yes	No		28	Yes	No	No	No	Yes	No	No	No	No	No	Yes	No	No	No	No	No	Yes	Yes	Yes	No	No	No	No		No	No	No	No	No	No	Yes	No	No	No	No	Yes	No	Yes	No	No
93	2021-01-19 18:32:23	5	ESPANISH	2021-01-19 18:28:28	2021-01-19 18:32:23	Yes	No		22	Yes	No	No	No	Yes	No	No	No	No	No	Yes	No	No	No	No	No	Yes	No	No	No	No	No	No		No	No	Yes	No	No	No	No	No	Yes	No	No	No	No	No	Yes	No
95	2021-01-19 18:36:22	5	ESPANISH	2021-01-19 18:28:36	2021-01-19 18:36:22	No	Yes		24	Yes	No	No	No	Yes	No	No	No	No	No	No	Yes	No	No	No	Yes	Yes	Yes	Yes	No	No	No	No		No	No	No	No	No	No	Yes	No	No	No	No	Yes	No	No	No	No
96	2021-01-19 18:35:11	5	ESPANISH	2021-01-19 18:28:57	2021-01-19 18:35:11	No	Yes		21	Yes	No	No	No	Yes	No	No	No	No	No	No	No	Yes	No	No	Yes	Yes	Yes	No	No	No	No	No		No	No	No	No	No	No	Yes	No	No	No	No	No	No	Yes	No	No
98	2021-01-19 18:35:14	5	ESPANISH	2021-01-19 18:29:32	2021-01-19 18:35:14	Yes	No		47	No	Yes	No	No	No	Yes	No	No	Yes	No	No	No	No	No	Yes	Yes	Yes	Yes	No	Yes	Yes	No	No		Yes	Yes	No	No	No	No	No	No	Yes	No	No	Yes	No	No	No	No
99	2021-01-19 18:37:28	5	ESPANISH	2021-01-19 18:29:55	2021-01-19 18:37:28	Yes	No		20	Yes	No	No	No	Yes	No	No	No	No	No	No	No	Yes	No	No	Yes	Yes	Yes	Yes	No	No	No	No		Yes	Yes	No	Yes	Yes	No	No	Yes	No	No	Yes	Yes	No	No	No	No
100	2021-01-19 18:34:45	5	ESPANISH	2021-01-19 18:29:55	2021-01-19 18:34:45	No	Yes		18	Yes	No	No	No	Yes	No	No	No	No	No	No	No	Yes	No	No	Yes	Yes	Yes	Yes	Yes	Yes	No	No		Yes	Yes	No	No	No	No	No	No	No	No	No	No	No	Yes	Yes	No
101	2021-01-19 18:35:30	5	ESPANISH	2021-01-19 18:30:07	2021-01-19 18:35:30	Yes	No		20	Yes	No	No	No	Yes	No	No	No	No	No	No	No	No	Yes	No	No	Yes	No	Yes	No	No	No	No		Yes	No	No	No	No	Yes	No	No	No	No	No	Yes	No	No	No	Yes
102	2021-01-19 18:34:47	5	ESPANISH	2021-01-19 18:30:15	2021-01-19 18:34:47	No	Yes		40	No	No	No	Yes	No	Yes	No	No	Yes	No	No	No	Yes	No	No	Yes	Yes	Yes	Yes	Yes	No	No	No		Yes	No	No	Yes	No	No	No	No	No	No	No	Yes	No	No	No	Yes
103	2021-01-19 18:34:14	5	ESPANISH	2021-01-19 18:30:22	2021-01-19 18:34:14	Yes	No		45	No	No	No	Yes	No	Yes	No	No	No	No	Yes	No	No	No	No	Yes	Yes	No	No	No	Yes	No	No		Yes	Yes	No	No	No	No	No	No	Yes	No	No	Yes	No	No	No	No
105	2021-01-19 18:39:11	5	ESPANISH	2021-01-19 18:30:26	2021-01-19 18:39:11	No	Yes		30	No	No	No	Yes	No	Yes	No	No	No	No	Yes	No	No	No	No	Yes	Yes	Yes	Yes	No	No	No	No		Yes	No	No	No	Yes	No	No	No	No	No	No	Yes	No	No	Yes	No
106	2021-01-19 18:35:31	5	ESPANISH	2021-01-19 18:30:38	2021-01-19 18:35:31	No	Yes		22	Yes	No	No	No	Yes	No	No	No	No	No	Yes	No	No	No	No	Yes	Yes	Yes	Yes	Yes	Yes	No	No		No	Yes	No	No	No	No	No	No	No	No	No	No	No	Yes	No	No
107	2021-01-19 18:34:57	5	ESPANISH	2021-01-19 18:30:38	2021-01-19 18:34:57	No	Yes		23	No	Yes	No	No	Yes	No	No	No	Yes	No	No	No	No	Yes	No	Yes	Yes	Yes	No	No	No	No	No		Yes	Yes	No	No	Yes	No	No	No	No	No	No	Yes	No	No	No	No
109	2021-01-19 18:38:11	5	ESPANISH	2021-01-19 18:31:07	2021-01-19 18:38:11	No	Yes		27	No	No	No	Yes	Yes	No	No	No	No	No	Yes	No	No	No	No	Yes	Yes	Yes	No	Yes	No	No	No		Yes	No	No	No	No	No	No	No	Yes	No	No	No	No	No	Yes	No
110	2021-01-19 18:37:35	5	ESPANISH	2021-01-19 18:31:11	2021-01-19 18:37:35	Yes	No		40	No	No	No	Yes	No	Yes	No	No	No	No	Yes	No	No	No	No	Yes	Yes	Yes	Yes	No	No	No	No	I restrict my social life as much as possible, but I have not totally eliminated contact with non-cohabitants.	Yes	Yes	No	No	No	No	No	No	No	No	No	Yes	Yes	No	No	No
111	2021-01-19 18:41:10	5	ESPANISH	2021-01-19 18:31:18	2021-01-19 18:41:10	Yes	No		60	No	No	No	Yes	No	Yes	No	No	No	No	No	No	No	Yes	No	Yes	Yes	Yes	Yes	Yes	No	No	No		Yes	Yes	Yes	Yes	Yes	No	No	No	Yes	Yes	Yes	Yes	No	No	No	No
112	2021-01-19 19:00:43	5	ESPANISH	2021-01-19 18:31:28	2021-01-19 19:00:43	No	Yes		22	No	Yes	No	No	Yes	No	No	No	No	No	No	No	Yes	No	No	No	Yes	Yes	No	No	No	No	No		Yes	No	No	No	No	No	No	No	No	No	No	No	No	Yes	No	Yes
114	2021-01-19 18:41:38	5	ESPANISH	2021-01-19 18:32:16	2021-01-19 18:41:38	Yes	No		64	Yes	No	No	No	No	Yes	No	No	Yes	No	No	Yes	No	No	No	Yes	Yes	Yes	Yes	Yes	No	No	No		Yes	No	No	No	No	No	No	No	Yes	No	No	No	No	No	No	No
115	2021-01-19 18:41:04	5	ESPANISH	2021-01-19 18:32:24	2021-01-19 18:41:04	No	Yes		20	Yes	No	No	No	No	Yes	No	No	No	No	No	Yes	No	No	No	Yes	Yes	Yes	No	No	No	No	No		Yes	No	No	No	No	No	No	No	No	No	No	Yes	No	No	No	No
117	2021-01-19 18:37:01	5	ESPANISH	2021-01-19 18:32:31	2021-01-19 18:37:01	No	Yes		23	No	No	No	Yes	Yes	No	No	No	No	No	Yes	No	No	No	No	Yes	Yes	Yes	No	No	No	No	No		Yes	Yes	Yes	No	Yes	No	No	No	Yes	Yes	No	Yes	No	No	No	No
118	2021-01-19 18:37:13	5	ESPANISH	2021-01-19 18:32:36	2021-01-19 18:37:13	Yes	No		20	Yes	No	No	No	Yes	No	No	No	No	No	No	No	Yes	No	No	Yes	Yes	Yes	Yes	Yes	Yes	No	No		Yes	No	No	No	No	No	No	No	No	No	No	No	No	Yes	No	Yes
119	2021-01-19 18:37:09	5	ESPANISH	2021-01-19 18:33:06	2021-01-19 18:37:09	No	Yes		24	Yes	No	No	No	Yes	No	No	No	No	No	Yes	No	No	No	No	Yes	Yes	Yes	Yes	Yes	No	No	No		No	No	Yes	No	Yes	No	No	No	No	Yes	No	Yes	No	No	No	No
121	2021-01-19 18:39:46	5	ESPANISH	2021-01-19 18:33:49	2021-01-19 18:39:46	No	Yes		65	No	No	No	Yes	No	Yes	No	No	No	No	Yes	No	No	No	No	No	Yes	Yes	Yes	No	No	No	No		Yes	No	No	No	No	No	No	No	No	No	No	No	No	Yes	No	No
122	2021-01-19 18:40:02	5	ESPANISH	2021-01-19 18:33:57	2021-01-19 18:40:02	No	Yes		18	Yes	No	No	No	Yes	No	No	No	No	No	No	No	Yes	No	No	Yes	Yes	Yes	Yes	No	No	No	No		Yes	No	Yes	No	No	No	No	No	No	Yes	No	Yes	Yes	No	No	No
123	2021-01-19 18:39:22	5	ESPANISH	2021-01-19 18:33:59	2021-01-19 18:39:22	Yes	No		21	Yes	No	No	No	No	Yes	No	No	No	No	No	Yes	No	No	No	Yes	Yes	Yes	Yes	No	No	No	No		Yes	No	No	No	No	No	No	Yes	No	No	No	No	No	No	No	No
124	2021-01-19 18:40:33	5	ESPANISH	2021-01-19 18:34:30	2021-01-19 18:40:33	Yes	No		18	Yes	No	No	No	Yes	No	No	No	No	No	No	No	No	Yes	No	Yes	Yes	Yes	No	No	No	No	No		Yes	No	No	No	No	Yes	No	Yes	No	No	No	Yes	Yes	No	No	No
125	2021-01-19 18:38:02	5	ESPANISH	2021-01-19 18:34:36	2021-01-19 18:38:02	No	Yes		19	Yes	No	No	No	Yes	No	No	No	No	No	No	No	Yes	No	No	Yes	Yes	Yes	No	Yes	No	No	No		Yes	No	No	No	No	No	No	No	No	No	No	No	No	Yes	No	No
126	2021-01-19 18:38:35	5	ESPANISH	2021-01-19 18:34:47	2021-01-19 18:38:35	No	Yes		18	Yes	No	No	No	Yes	No	No	No	No	No	No	Yes	No	No	No	Yes	Yes	Yes	No	No	No	No	No		Yes	No	Yes	No	Yes	No	No	No	No	No	No	Yes	No	No	No	No
128	2021-01-19 19:07:22	5	ESPANISH	2021-01-19 18:35:01	2021-01-19 19:07:22	No	Yes		22	No	Yes	No	No	Yes	No	No	No	No	No	No	No	No	Yes	No	Yes	Yes	Yes	Yes	No	No	No	No	I do not stay with non-cohabitants without a mask (except partner)	Yes	No	No	No	No	No	No	Yes	No	No	No	No	No	No	No	Yes
129	2021-01-19 18:43:40	5	ESPANISH	2021-01-19 18:36:22	2021-01-19 18:43:40	Yes	No		18	Yes	No	No	No	Yes	No	No	No	No	Yes	No	No	No	No	No	No	Yes	No	No	No	No	No	No	avoid the hospital	Yes	Yes	No	No	Yes	No	No	No	Yes	No	No	Yes	No	No	No	Yes
130	2021-01-19 18:47:00	5	ESPANISH	2021-01-19 18:36:43	2021-01-19 18:47:00	Yes	No		55	No	No	No	Yes	No	Yes	No	No	Yes	No	No	No	Yes	No	No	Yes	Yes	Yes	Yes	Yes	No	No	No		Yes	No	No	No	No	No	No	No	Yes	No	No	No	No	No	No	No
131	2021-01-19 18:41:43	5	ESPANISH	2021-01-19 18:37:02	2021-01-19 18:41:43	Yes	No		57	No	No	No	Yes	No	Yes	No	No	Yes	No	No	No	Yes	No	No	Yes	Yes	Yes	Yes	Yes	No	No	No		Yes	Yes	No	No	Yes	No	No	No	No	Yes	No	Yes	No	No	No	Yes
133	2021-01-19 18:41:47	5	ESPANISH	2021-01-19 18:37:36	2021-01-19 18:41:47	Yes	No		49	No	No	No	Yes	Yes	No	No	No	No	No	Yes	No	No	No	No	Yes	Yes	Yes	No	No	No	No	No		Yes	Yes	No	No	No	No	No	No	Yes	No	No	Yes	No	No	No	No
134	2021-01-19 18:46:09	5	ESPANISH	2021-01-19 18:37:44	2021-01-19 18:46:09	No	Yes		55	No	No	No	Yes	No	Yes	No	No	No	No	Yes	No	No	No	No	Yes	Yes	Yes	Yes	Yes	No	No	No		Yes	No	Yes	No	Yes	No	No	No	No	No	Yes	Yes	No	No	No	No
135	2021-01-19 18:45:01	5	ESPANISH	2021-01-19 18:37:58	2021-01-19 18:45:01	Yes	No		33	No	No	No	Yes	Yes	No	No	No	No	Yes	No	No	No	No	No	Yes	Yes	Yes	Yes	No	No	No	No		Yes	Yes	No	No	Yes	No	No	No	Yes	No	No	Yes	No	No	No	No
138	2021-01-19 18:46:58	5	ESPANISH	2021-01-19 18:39:12	2021-01-19 18:46:58	No	Yes		20	Yes	No	No	No	Yes	No	No	No	No	No	No	No	Yes	No	No	Yes	Yes	Yes	No	Yes	No	No	No		No	No	No	No	No	No	Yes	No	No	No	No	No	Yes	No	No	Yes
139	2021-01-19 18:45:29	5	ESPANISH	2021-01-19 18:39:22	2021-01-19 18:45:29	No	Yes		25	No	Yes	No	No	Yes	No	No	No	No	No	No	Yes	No	No	No	Yes	Yes	Yes	Yes	No	No	No	No		Yes	Yes	No	No	Yes	No	No	No	Yes	No	No	Yes	No	No	No	Yes
140	2021-01-19 18:47:18	5	ESPANISH	2021-01-19 18:39:24	2021-01-19 18:47:18	Yes	No		19	Yes	No	No	No	Yes	No	No	No	No	Yes	No	No	No	No	No	Yes	Yes	Yes	No	No	No	No	No		No	Yes	No	No	Yes	Yes	No	No	No	No	No	Yes	No	No	No	No
141	2021-01-19 18:44:22	5	ESPANISH	2021-01-19 18:39:31	2021-01-19 18:44:22	No	Yes		51	No	No	No	Yes	No	Yes	No	No	Yes	No	No	No	Yes	No	No	Yes	Yes	Yes	Yes	Yes	No	No	No		Yes	Yes	Yes	No	Yes	No	No	No	Yes	Yes	No	Yes	No	No	No	No
142	2021-01-19 18:46:43	5	ESPANISH	2021-01-19 18:40:02	2021-01-19 18:46:43	No	Yes		18	Yes	No	No	No	Yes	No	No	No	No	No	No	Yes	No	No	No	Yes	Yes	Yes	No	No	No	No	No		Yes	No	No	No	Yes	No	No	No	No	Yes	No	Yes	No	No	No	No
143	2021-01-19 18:45:44	5	ESPANISH	2021-01-19 18:41:10	2021-01-19 18:45:44	Yes	No		22	Yes	No	No	No	Yes	No	No	No	No	No	No	No	Yes	No	No	Yes	Yes	Yes	Yes	Yes	No	No	No		Yes	Yes	No	No	No	No	No	No	Yes	No	No	No	No	No	Yes	No
144	2021-01-19 18:45:46	5	ESPANISH	2021-01-19 18:41:20	2021-01-19 18:45:46	No	Yes		22	Yes	No	No	No	Yes	No	No	No	No	No	No	No	Yes	No	No	Yes	Yes	Yes	Yes	No	No	No	No		Yes	No	No	No	Yes	No	No	No	No	No	No	Yes	No	No	No	No
145	2021-01-19 18:46:12	5	ESPANISH	2021-01-19 18:42:02	2021-01-19 18:46:12	No	Yes		61	No	No	No	Yes	No	Yes	No	No	Yes	No	No	No	No	Yes	No	Yes	Yes	Yes	No	Yes	No	No	No		Yes	Yes	No	No	No	No	No	No	Yes	No	No	Yes	No	No	No	No
147	2021-01-19 18:55:23	5	ESPANISH	2021-01-19 18:42:16	2021-01-19 18:55:23	No	Yes		56	No	No	No	Yes	No	Yes	No	No	No	No	Yes	No	No	No	No	Yes	Yes	Yes	No	Yes	No	No	No		Yes	Yes	Yes	No	Yes	No	No	No	No	No	No	Yes	No	No	No	No
149	2021-01-19 18:46:58	5	ESPANISH	2021-01-19 18:42:59	2021-01-19 18:46:58	No	Yes		19	Yes	No	No	No	Yes	No	No	No	No	No	No	No	Yes	No	No	Yes	Yes	Yes	No	No	No	No	No		Yes	Yes	No	No	No	No	No	No	Yes	No	No	Yes	No	No	No	No
150	2021-01-19 18:49:06	5	ESPANISH	2021-01-19 18:43:08	2021-01-19 18:49:06	No	Yes		48	No	No	No	Yes	No	Yes	No	No	No	No	Yes	No	No	No	No	Yes	Yes	Yes	Yes	Yes	No	No	No		Yes	Yes	No	No	No	No	No	No	Yes	No	No	No	No	No	No	No
151	2021-01-19 18:47:47	5	ESPANISH	2021-01-19 18:43:30	2021-01-19 18:47:47	Yes	No		40	No	No	No	Yes	Yes	No	No	No	No	Yes	No	No	No	No	No	Yes	Yes	Yes	No	No	No	No	No		Yes	Yes	Yes	No	Yes	No	No	No	Yes	Yes	No	Yes	Yes	No	No	Yes
152	2021-01-19 18:47:18	5	ESPANISH	2021-01-19 18:43:44	2021-01-19 18:47:18	Yes	No		22	Yes	No	No	No	Yes	No	No	No	No	No	No	No	No	Yes	No	Yes	Yes	Yes	No	No	No	No	No		Yes	Yes	Yes	No	Yes	No	No	Yes	Yes	No	No	Yes	No	No	Yes	No
153	2021-01-19 18:51:41	5	ESPANISH	2021-01-19 18:44:00	2021-01-19 18:51:41	Yes	No		55	No	No	No	Yes	Yes	No	No	No	No	Yes	No	No	No	No	No	Yes	Yes	Yes	No	No	No	No	No		Yes	Yes	No	No	Yes	Yes	No	No	Yes	No	No	Yes	No	No	No	No
154	2021-01-19 18:49:24	5	ESPANISH	2021-01-19 18:44:18	2021-01-19 18:49:24	Yes	No		70	No	No	No	Yes	No	Yes	No	No	No	No	Yes	No	No	No	No	Yes	Yes	Yes	No	No	No	No	No		No	Yes	Yes	No	Yes	No	No	No	No	No	No	Yes	No	No	No	No
155	2021-01-19 18:49:49	5	ESPANISH	2021-01-19 18:44:32	2021-01-19 18:49:49	Yes	No		20	Yes	No	No	No	Yes	No	No	No	No	No	No	No	Yes	No	No	Yes	Yes	No	Yes	No	No	No	No		Yes	No	No	No	No	No	No	No	No	No	No	No	No	Yes	No	Yes
156	2021-01-19 18:50:46	5	ESPANISH	2021-01-19 18:45:38	2021-01-19 18:50:46	No	Yes		18	Yes	No	No	No	Yes	No	No	No	No	No	No	No	Yes	No	No	Yes	Yes	Yes	No	No	No	No	No		Yes	No	Yes	No	No	No	No	No	No	Yes	No	Yes	No	No	No	No
157	2021-01-19 18:52:52	5	ESPANISH	2021-01-19 18:45:43	2021-01-19 18:52:52	No	Yes		19	Yes	No	No	No	Yes	No	No	No	No	No	No	No	Yes	No	No	Yes	Yes	No	No	No	No	No	No		Yes	No	No	No	No	No	No	No	No	Yes	No	Yes	No	No	No	Yes
158	2021-01-19 19:06:45	5	ESPANISH	2021-01-19 18:45:44	2021-01-19 19:06:45	No	Yes		50	No	No	No	Yes	No	Yes	No	No	Yes	No	No	No	Yes	No	No	No	Yes	Yes	No	No	No	No	No		Yes	Yes	No	No	Yes	No	No	No	Yes	No	No	Yes	No	No	No	Yes
159	2021-01-19 18:50:07	5	ESPANISH	2021-01-19 18:46:03	2021-01-19 18:50:07	No	Yes		20	Yes	No	No	No	Yes	No	No	No	No	No	No	Yes	No	No	No	Yes	Yes	Yes	Yes	No	No	No	No		Yes	No	Yes	No	No	No	No	No	No	Yes	No	Yes	No	No	No	No
160	2021-01-19 18:56:23	5	ESPANISH	2021-01-19 18:46:35	2021-01-19 18:56:23	No	Yes		53	No	No	No	Yes	No	Yes	No	No	Yes	No	No	No	Yes	No	No	Yes	Yes	Yes	Yes	Yes	No	No	No		Yes	Yes	No	No	No	No	No	No	No	Yes	No	Yes	No	No	No	No
161	2021-01-19 18:51:12	5	ESPANISH	2021-01-19 18:47:00	2021-01-19 18:51:12	No	Yes		19 years	Yes	No	No	No	Yes	No	No	No	No	No	No	No	Yes	No	No	Yes	Yes	Yes	No	No	No	No	No		No	No	No	No	No	No	Yes	No	No	Yes	Yes	No	No	No	No	Yes
162	2021-01-19 18:52:52	5	ESPANISH	2021-01-19 18:47:25	2021-01-19 18:52:52	No	Yes		23	No	Yes	No	No	Yes	No	No	No	No	No	Yes	No	No	No	No	Yes	Yes	Yes	No	Yes	No	No	No		Yes	Yes	No	No	Yes	No	No	No	Yes	No	No	Yes	No	No	No	No
163	2021-01-19 19:11:01	5	ESPANISH	2021-01-19 18:48:19	2021-01-19 19:11:01	Yes	No		35	Yes	No	No	No	Yes	No	No	No	No	No	Yes	No	No	No	No	Yes	Yes	Yes	No	No	No	No	No	Do not meet with more than 6 people	Yes	Yes	No	No	No	No	No	No	Yes	Yes	No	Yes	No	No	No	No
165	2021-01-19 18:53:47	5	ESPANISH	2021-01-19 18:48:58	2021-01-19 18:53:47	No	Yes		55	No	No	No	Yes	No	Yes	No	No	Yes	No	No	No	No	Yes	No	Yes	Yes	Yes	Yes	No	No	No	No		Yes	Yes	No	No	No	No	No	No	No	No	No	Yes	No	No	No	No
166	2021-01-19 18:57:44	5	ESPANISH	2021-01-19 18:49:13	2021-01-19 18:57:44	Yes	No		60	No	No	No	Yes	No	Yes	No	No	Yes	No	No	Yes	No	No	No	Yes	Yes	Yes	No	Yes	No	No	No		Yes	Yes	No	Yes	No	No	No	No	Yes	Yes	Yes	No	No	No	No	No
167	2021-01-19 18:54:33	5	ESPANISH	2021-01-19 18:49:18	2021-01-19 18:54:33	No	Yes		35	No	No	No	Yes	No	Yes	No	No	No	No	Yes	No	No	No	No	Yes	Yes	Yes	No	No	No	No	No		Yes	Yes	No	No	Yes	No	No	No	Yes	No	No	Yes	No	No	No	No
168	2021-01-19 18:58:24	5	ESPANISH	2021-01-19 18:50:07	2021-01-19 18:58:24	No	Yes		18	Yes	No	No	No	Yes	No	No	No	No	No	No	No	No	Yes	No	Yes	Yes	Yes	Yes	No	No	No	No		Yes	No	Yes	No	Yes	No	No	No	No	Yes	No	Yes	No	No	No	Yes
169	2021-01-19 18:56:46	5	ESPANISH	2021-01-19 18:50:42	2021-01-19 18:56:46	No	Yes		20	Yes	No	No	No	Yes	No	No	No	No	No	No	No	Yes	No	No	Yes	Yes	No	Yes	No	No	No	No		Yes	No	No	No	No	No	No	No	No	No	No	No	No	Yes	No	No
171	2021-01-19 18:58:50	5	ESPANISH	2021-01-19 18:52:46	2021-01-19 18:58:50	No	Yes		18 years.	Yes	No	No	No	Yes	No	No	No	No	No	No	No	Yes	No	No	Yes	Yes	Yes	Yes	No	No	No	No	I stay with my closest circle of friends only.	Yes	No	No	No	No	No	No	No	No	No	No	Yes	No	No	No	No
172	2021-01-19 19:00:41	5	ESPANISH	2021-01-19 18:53:13	2021-01-19 19:00:41	Yes	No		23	No	Yes	No	No	Yes	No	No	No	No	No	No	Yes	No	No	No	Yes	Yes	Yes	Yes	No	No	No	No		Yes	No	No	No	Yes	No	No	No	Yes	No	No	Yes	No	No	No	No
174	2021-01-19 19:02:31	5	ESPANISH	2021-01-19 18:56:20	2021-01-19 19:02:31	No	Yes		61	No	No	Yes	No	No	No	No	Yes	No	No	Yes	No	No	No	No	Yes	Yes	Yes	No	No	No	No	No		No	Yes	No	No	Yes	No	No	No	Yes	No	Yes	Yes	No	No	No	Yes
176	2021-01-19 19:07:31	5	ESPANISH	2021-01-19 18:57:29	2021-01-19 19:07:31	No	Yes		18	Yes	No	No	No	Yes	No	No	No	No	No	No	Yes	No	No	No	Yes	Yes	Yes	No	No	No	No	No		Yes	No	No	No	No	No	No	No	No	No	No	Yes	No	No	No	No
177	2021-01-19 19:02:48	5	ESPANISH	2021-01-19 18:57:36	2021-01-19 19:02:48	No	Yes		21	Yes	No	No	No	Yes	No	No	No	No	No	No	No	Yes	No	No	Yes	Yes	Yes	No	No	No	No	No		No	Yes	No	No	No	No	No	No	No	No	No	Yes	No	No	No	No
178	2021-01-19 19:06:49	5	ESPANISH	2021-01-19 18:57:58	2021-01-19 19:06:49	No	Yes		27	No	Yes	No	No	Yes	No	No	No	No	No	No	No	Yes	No	No	Yes	Yes	Yes	No	Yes	No	No	No		No	Yes	No	No	Yes	No	No	No	Yes	No	No	Yes	No	No	No	No
179	2021-01-19 19:14:30	5	ESPANISH	2021-01-19 18:59:55	2021-01-19 19:14:30	No	Yes		22	Yes	No	No	No	Yes	No	No	No	No	No	Yes	No	No	No	No	Yes	Yes	Yes	Yes	No	No	No	No		Yes	Yes	No	No	Yes	No	No	No	No	No	No	Yes	No	No	No	No
180	2021-01-19 19:18:00	5	ESPANISH	2021-01-19 19:00:05	2021-01-19 19:18:00	Yes	No		18	Yes	No	No	No	Yes	No	No	No	No	No	No	Yes	No	No	No	No	Yes	Yes	No	No	No	No	No		Yes	Yes	No	No	No	No	No	No	No	No	No	Yes	No	No	No	Yes
181	2021-01-19 19:07:43	5	ESPANISH	2021-01-19 19:00:52	2021-01-19 19:07:43	No	Yes		56	No	No	No	Yes	No	Yes	No	No	No	No	Yes	No	No	No	No	Yes	Yes	Yes	Yes	Yes	No	No	No		Yes	Yes	No	No	Yes	No	No	No	No	No	No	Yes	No	No	No	No
182	2021-01-19 19:08:37	5	ESPANISH	2021-01-19 19:01:31	2021-01-19 19:08:37	No	Yes		56	No	No	No	Yes	No	Yes	No	No	Yes	No	No	Yes	No	No	No	No	No	No	No	No	No	Yes	No		Yes	Yes	Yes	No	No	No	No	No	Yes	Yes	No	No	No	No	No	Yes
183	2021-01-19 19:17:54	5	ESPANISH	2021-01-19 19:01:40	2021-01-19 19:17:54	No	Yes		23	No	Yes	No	No	Yes	No	No	No	No	No	No	No	Yes	No	No	Yes	Yes	Yes	No	No	No	No	No		Yes	No	No	No	No	No	No	No	No	No	No	Yes	No	No	No	No
184	2021-01-19 19:09:42	5	ESPANISH	2021-01-19 19:02:11	2021-01-19 19:09:42	No	Yes		21	Yes	No	No	No	Yes	No	No	No	No	No	No	No	No	Yes	No	Yes	Yes	Yes	No	Yes	No	No	No		Yes	No	No	No	No	No	No	No	No	No	No	Yes	No	No	No	No
185	2021-01-19 19:09:17	5	ESPANISH	2021-01-19 19:04:39	2021-01-19 19:09:17	Yes	No		37	No	No	No	Yes	No	Yes	No	No	Yes	No	No	Yes	No	No	No	Yes	Yes	Yes	Yes	No	No	No	No		Yes	Yes	No	No	Yes	No	No	Yes	Yes	No	No	Yes	No	No	No	No
186	2021-01-19 19:10:36	5	ESPANISH	2021-01-19 19:04:52	2021-01-19 19:10:36	No	Yes		44	No	No	No	Yes	Yes	No	No	No	No	Yes	No	No	No	No	No	Yes	Yes	Yes	Yes	No	Yes	No	No		Yes	Yes	Yes	No	Yes	No	No	No	No	No	No	Yes	No	Yes	No	No
187	2021-01-19 19:12:50	5	ESPANISH	2021-01-19 19:05:05	2021-01-19 19:12:50	Yes	No		40	No	No	No	Yes	No	Yes	No	No	Yes	No	No	No	Yes	No	No	Yes	Yes	Yes	No	No	No	No	No		Yes	Yes	No	No	Yes	No	No	No	No	No	No	Yes	No	No	No	No
188	2021-01-19 19:12:18	5	ESPANISH	2021-01-19 19:05:35	2021-01-19 19:12:18	Yes	No		24	Yes	No	No	No	Yes	No	No	No	No	No	No	No	Yes	No	No	Yes	Yes	Yes	No	No	No	No	No		Yes	Yes	No	No	Yes	No	No	No	Yes	No	No	Yes	No	No	No	No
192	2021-01-19 19:14:50	5	ESPANISH	2021-01-19 19:10:03	2021-01-19 19:14:50	Yes	No		24	Yes	No	No	No	Yes	No	No	No	No	No	No	No	Yes	No	No	Yes	Yes	Yes	No	No	No	No	No		Yes	Yes	Yes	No	Yes	No	No	Yes	No	Yes	No	Yes	No	No	No	No
194	2021-01-19 19:14:44	5	ESPANISH	2021-01-19 19:10:53	2021-01-19 19:14:44	No	Yes		40	No	No	No	Yes	No	Yes	No	No	Yes	No	No	No	Yes	No	No	Yes	Yes	Yes	No	No	No	No	No	I ventilate constantly	Yes	Yes	Yes	No	Yes	No	No	No	Yes	No	Yes	Yes	No	No	No	No
195	2021-01-19 19:16:45	5	ESPANISH	2021-01-19 19:12:51	2021-01-19 19:16:44	Yes	No		21	Yes	No	No	No	Yes	No	No	No	No	No	Yes	No	No	No	No	Yes	No	Yes	No	No	Yes	No	No		No	No	No	No	Yes	No	No	No	No	No	No	Yes	No	No	No	No
198	2021-01-19 19:23:32	5	ESPANISH	2021-01-19 19:14:32	2021-01-19 19:23:32	No	Yes		60	No	No	No	Yes	No	Yes	No	No	No	No	Yes	No	No	No	No	Yes	Yes	Yes	Yes	Yes	No	No	No		Yes	Yes	Yes	No	Yes	No	No	No	No	No	No	No	No	Yes	No	Yes
199	2021-01-19 19:21:43	5	ESPANISH	2021-01-19 19:15:08	2021-01-19 19:21:43	Yes	No		38	No	No	No	Yes	Yes	No	No	No	No	No	Yes	No	No	No	No	Yes	Yes	Yes	No	Yes	No	No	No		Yes	No	No	No	No	No	No	No	Yes	No	No	No	No	No	No	No
201	2021-01-19 19:20:33	5	ESPANISH	2021-01-19 19:16:34	2021-01-19 19:20:33	Yes	No		33	No	No	No	Yes	Yes	No	No	No	No	No	No	No	Yes	No	No	Yes	Yes	Yes	Yes	Yes	No	No	No		Yes	No	No	No	No	No	No	No	No	No	No	No	No	Yes	No	No
202	2021-01-19 19:20:39	5	ESPANISH	2021-01-19 19:17:09	2021-01-19 19:20:39	No	Yes		18	Yes	No	No	No	Yes	No	No	No	No	No	No	No	Yes	No	No	Yes	Yes	Yes	Yes	No	No	No	No		Yes	No	No	No	No	No	No	No	No	No	No	Yes	Yes	No	Yes	No
203	2021-01-19 19:22:46	5	ESPANISH	2021-01-19 19:17:30	2021-01-19 19:22:46	No	Yes		24	No	Yes	No	No	Yes	No	No	No	No	No	No	No	Yes	No	No	Yes	Yes	Yes	No	No	No	No	No		Yes	No	Yes	No	Yes	No	No	No	No	Yes	No	Yes	No	No	No	No
204	2021-01-19 19:22:57	5	ESPANISH	2021-01-19 19:18:00	2021-01-19 19:22:57	No	Yes		25	Yes	No	No	No	Yes	No	No	No	No	No	No	Yes	No	No	No	Yes	Yes	No	No	No	No	No	No		Yes	Yes	Yes	No	No	No	No	No	No	No	No	No	No	Yes	No	No
205	2021-01-19 19:27:09	5	ESPANISH	2021-01-19 19:20:40	2021-01-19 19:27:09	No	Yes		18	Yes	No	No	No	Yes	No	No	No	No	No	No	No	No	Yes	No	No	Yes	No	No	No	No	No	No		No	No	Yes	No	No	No	No	No	No	No	No	Yes	No	No	No	No
209	2021-01-19 19:28:23	5	ESPANISH	2021-01-19 19:23:36	2021-01-19 19:28:23	Yes	No		58	No	No	No	Yes	No	No	No	Yes	No	No	No	Yes	No	No	No	Yes	Yes	Yes	Yes	Yes	No	No	No		No	No	Yes	No	No	No	No	No	No	No	No	Yes	No	No	No	No
210	2021-01-19 19:28:21	5	ESPANISH	2021-01-19 19:23:53	2021-01-19 19:28:21	No	Yes		52	No	No	No	Yes	Yes	No	No	No	No	No	Yes	No	No	No	No	No	Yes	Yes	No	No	No	No	No		Yes	Yes	Yes	No	No	No	No	No	No	No	No	Yes	No	No	No	No
211	2021-01-19 19:31:13	5	ESPANISH	2021-01-19 19:24:01	2021-01-19 19:31:13	No	Yes		26	No	No	No	Yes	Yes	No	No	No	No	No	Yes	No	No	No	No	Yes	Yes	Yes	No	No	No	No	No		Yes	Yes	No	No	No	No	No	No	No	No	No	Yes	No	No	No	Yes
212	2021-01-19 19:32:12	5	ESPANISH	2021-01-19 19:27:08	2021-01-19 19:32:12	Yes	No		58	No	No	No	Yes	No	Yes	No	No	No	No	Yes	No	No	No	No	No	Yes	Yes	Yes	No	Yes	No	No		Yes	No	No	No	No	No	No	No	Yes	No	No	No	No	No	No	No
213	2021-01-19 19:34:20	5	ESPANISH	2021-01-19 19:28:18	2021-01-19 19:34:20	Yes	No		67	No	No	No	Yes	No	Yes	No	No	No	No	Yes	No	No	No	No	Yes	Yes	Yes	Yes	Yes	No	No	No		Yes	No	No	No	No	No	No	No	No	Yes	No	Yes	No	No	No	No
215	2021-01-19 19:36:32	5	ESPANISH	2021-01-19 19:28:46	2021-01-19 19:36:32	Yes	No		52	No	No	No	Yes	No	No	No	Yes	No	Yes	No	No	No	No	No	Yes	Yes	Yes	Yes	No	No	No	No		Yes	Yes	No	Yes	Yes	No	No	No	No	No	No	Yes	No	No	No	Yes
217	2021-01-19 19:33:43	5	ESPANISH	2021-01-19 19:29:52	2021-01-19 19:33:43	No	Yes		20	Yes	No	No	No	Yes	No	No	No	No	No	No	Yes	No	No	No	Yes	No	No	Yes	No	No	No	No		Yes	No	No	No	Yes	No	No	No	No	No	No	Yes	No	No	Yes	No
219	2021-01-19 19:52:46	5	ESPANISH	2021-01-19 19:30:36	2021-01-19 19:52:46	Yes	No		23	No	Yes	No	No	Yes	No	No	No	No	No	Yes	No	No	No	No	Yes	Yes	Yes	No	No	No	No	No		Yes	No	No	No	No	No	No	Yes	No	No	No	Yes	No	No	No	No
220	2021-01-19 19:35:29	5	ESPANISH	2021-01-19 19:30:56	2021-01-19 19:35:29	No	Yes		20	Yes	No	No	No	Yes	No	No	No	No	No	No	No	No	No	Yes	Yes	Yes	Yes	Yes	No	No	No	No		Yes	Yes	No	No	Yes	No	No	Yes	Yes	Yes	No	Yes	No	No	No	No
221	2021-01-19 19:38:14	5	ESPANISH	2021-01-19 19:31:34	2021-01-19 19:38:14	No	Yes		31	No	No	No	Yes	No	Yes	No	No	Yes	No	No	No	Yes	No	No	Yes	Yes	Yes	Yes	Yes	No	No	No		Yes	Yes	No	No	No	No	No	No	Yes	No	No	Yes	No	No	No	No
222	2021-01-19 19:36:21	5	ESPANISH	2021-01-19 19:31:40	2021-01-19 19:36:21	No	Yes		24	Yes	No	No	No	Yes	No	No	No	No	No	Yes	No	No	No	No	No	Yes	Yes	No	No	No	No	No		Yes	No	Yes	No	No	No	No	No	No	No	No	Yes	No	No	No	No
223	2021-01-19 19:36:50	5	ESPANISH	2021-01-19 19:32:16	2021-01-19 19:36:50	No	Yes		22	Yes	No	No	No	Yes	No	No	No	Yes	No	No	No	No	Yes	No	Yes	Yes	Yes	No	Yes	No	No	No		Yes	No	No	No	No	No	No	No	No	No	No	No	No	Yes	No	No
224	2021-01-19 19:39:18	5	ESPANISH	2021-01-19 19:32:53	2021-01-19 19:39:18	Yes	No		57	No	No	No	Yes	No	Yes	No	No	No	No	No	Yes	No	No	No	Yes	Yes	Yes	No	No	No	No	No		Yes	No	Yes	Yes	Yes	No	No	No	No	Yes	Yes	Yes	No	No	No	Yes
225	2021-01-19 19:41:39	5	ESPANISH	2021-01-19 19:35:02	2021-01-19 19:41:39	No	Yes		53	No	No	No	Yes	No	Yes	No	No	Yes	No	No	Yes	No	No	No	Yes	Yes	Yes	Yes	No	No	No	No		Yes	Yes	No	No	No	No	No	No	No	Yes	Yes	Yes	No	No	No	No
226	2021-01-19 19:41:07	5	ESPANISH	2021-01-19 19:36:12	2021-01-19 19:41:07	Yes	No		55	No	No	No	Yes	No	Yes	No	No	Yes	No	No	No	No	Yes	No	Yes	Yes	Yes	Yes	No	No	No	No		Yes	Yes	Yes	Yes	No	No	No	No	Yes	Yes	Yes	No	No	No	Yes	No
227	2021-01-19 19:42:45	5	ESPANISH	2021-01-19 19:37:06	2021-01-19 19:42:45	No	Yes		44	No	No	No	Yes	Yes	No	No	No	No	No	Yes	No	No	No	No	Yes	Yes	Yes	Yes	Yes	Yes	No	No		Yes	Yes	No	No	No	No	No	No	No	No	No	No	No	Yes	No	No
229	2021-01-19 19:47:02	5	ESPANISH	2021-01-19 19:40:58	2021-01-19 19:47:02	No	Yes		37	No	No	No	Yes	No	Yes	No	No	Yes	No	No	No	No	Yes	No	Yes	Yes	Yes	No	No	No	No	No		Yes	Yes	No	No	No	No	No	No	No	No	No	Yes	No	No	No	No
230	2021-01-19 19:46:38	5	ESPANISH	2021-01-19 19:41:07	2021-01-19 19:46:38	No	Yes		19	Yes	No	No	No	Yes	No	No	No	No	No	No	No	Yes	No	No	Yes	Yes	Yes	No	No	No	No	No		Yes	No	No	No	No	No	No	No	No	Yes	No	No	No	Yes	No	No
231	2021-01-19 19:47:27	5	ESPANISH	2021-01-19 19:42:33	2021-01-19 19:47:27	No	Yes		25	Yes	No	No	No	Yes	No	No	No	No	No	No	Yes	No	No	No	Yes	Yes	Yes	No	No	No	No	No		Yes	Yes	No	No	Yes	No	No	No	No	No	No	Yes	No	No	No	No
232	2021-01-19 19:50:56	5	ESPANISH	2021-01-19 19:43:12	2021-01-19 19:50:56	No	Yes		56	No	No	No	Yes	No	Yes	No	No	No	No	Yes	No	No	No	No	Yes	Yes	Yes	Yes	Yes	Yes	No	No		Yes	Yes	No	No	No	No	No	No	No	No	No	No	No	Yes	No	No
235	2021-01-19 19:47:28	5	ESPANISH	2021-01-19 19:45:15	2021-01-19 19:47:28	No	Yes		44	No	No	No	Yes	Yes	No	No	No	No	No	Yes	No	No	No	No	Yes	Yes	Yes	Yes	Yes	Yes	No	No		Yes	Yes	No	No	No	No	No	No	No	No	No	No	No	Yes	No	No
236	2021-01-19 20:05:45	5	ESPANISH	2021-01-19 19:45:19	2021-01-19 20:05:45	Yes	No		24	Yes	No	No	No	No	Yes	No	No	No	No	No	No	Yes	No	No	Yes	Yes	Yes	No	No	No	No	No	6th year Medicine student (I disclose information from reliable sources on prevention measures and the importance of vaccination)	Yes	No	No	No	No	No	No	No	Yes	No	No	Yes	No	No	No	No
237	2021-01-19 19:51:00	5	ESPANISH	2021-01-19 19:45:45	2021-01-19 19:51:00	No	Yes		20	Yes	No	No	No	Yes	No	No	No	No	No	No	No	No	No	Yes	No	Yes	Yes	No	No	No	No	No		No	No	Yes	No	Yes	No	No	No	No	Yes	No	Yes	No	No	No	No
238	2021-01-19 19:53:37	5	ESPANISH	2021-01-19 19:46:27	2021-01-19 19:53:37	Yes	No		42	No	No	No	Yes	No	Yes	No	No	Yes	No	No	No	Yes	No	No	Yes	Yes	Yes	Yes	Yes	No	No	No		Yes	Yes	No	Yes	No	No	No	No	Yes	No	No	Yes	No	No	No	No
239	2021-01-19 19:51:07	5	ESPANISH	2021-01-19 19:46:57	2021-01-19 19:51:07	Yes	No		18	Yes	No	No	No	Yes	No	No	No	No	No	No	No	No	Yes	No	No	No	Yes	No	No	No	No	No		No	No	No	No	Yes	No	No	No	No	No	No	Yes	Yes	No	No	No
240	2021-01-19 20:01:04	5	ESPANISH	2021-01-19 19:47:26	2021-01-19 20:01:04	No	Yes		26	No	No	No	Yes	Yes	No	No	No	No	Yes	No	No	No	No	No	Yes	Yes	Yes	Yes	Yes	No	No	No		Yes	No	No	No	No	No	No	No	Yes	No	No	Yes	No	No	No	Yes
241	2021-01-19 20:00:30	5	ESPANISH	2021-01-19 19:47:34	2021-01-19 20:00:30	No	Yes		69 years	No	No	Yes	No	No	No	Yes	No	No	Yes	No	No	No	No	No	Yes	Yes	Yes	Yes	No	No	No	No		No	Yes	Yes	No	Yes	No	No	No	No	No	No	Yes	No	No	No	No
242	2021-01-19 19:52:31	5	ESPANISH	2021-01-19 19:48:35	2021-01-19 19:52:31	Yes	No		18	Yes	No	No	No	Yes	No	No	No	No	No	No	Yes	No	No	No	Yes	Yes	Yes	No	No	No	No	No		Yes	No	No	No	No	No	No	No	No	No	No	Yes	No	No	No	No
243	2021-01-19 19:54:56	5	ESPANISH	2021-01-19 19:49:21	2021-01-19 19:54:56	No	Yes		19	Yes	No	No	No	Yes	No	No	No	No	No	No	Yes	No	No	No	Yes	Yes	Yes	Yes	Yes	Yes	No	No		Yes	No	No	No	No	No	No	No	No	No	No	No	No	Yes	No	No
245	2021-01-19 19:56:20	5	ESPANISH	2021-01-19 19:51:29	2021-01-19 19:56:20	Yes	No		55	No	No	No	Yes	No	Yes	No	No	No	No	Yes	No	No	No	No	Yes	Yes	Yes	No	Yes	No	No	No		Yes	Yes	Yes	No	No	No	No	No	Yes	No	No	No	No	No	No	No
246	2021-01-19 20:09:17	5	ESPANISH	2021-01-19 19:57:04	2021-01-19 20:09:17	No	Yes		28	No	No	No	Yes	No	Yes	No	No	No	No	Yes	No	No	No	No	Yes	Yes	Yes	Yes	No	No	No	No		No	Yes	No	No	No	No	No	No	No	No	No	Yes	No	No	No	No
247	2021-01-19 20:08:39	5	ESPANISH	2021-01-19 20:03:24	2021-01-19 20:08:39	No	Yes		49	No	No	No	Yes	No	Yes	No	No	Yes	No	No	Yes	No	No	No	Yes	Yes	Yes	Yes	Yes	No	No	No		Yes	Yes	No	No	Yes	No	No	Yes	No	No	No	Yes	No	No	No	No
248	2021-01-19 20:09:17	5	ESPANISH	2021-01-19 20:03:39	2021-01-19 20:09:17	No	Yes		57	No	No	No	Yes	No	Yes	No	No	Yes	No	No	Yes	No	No	No	Yes	Yes	Yes	Yes	Yes	No	No	No		Yes	Yes	No	No	No	No	No	No	No	No	No	Yes	No	No	No	No
249	2021-01-19 20:13:50	5	ESPANISH	2021-01-19 20:04:16	2021-01-19 20:13:50	No	Yes		56	No	No	Yes	No	No	No	No	Yes	No	Yes	No	No	No	No	No	Yes	Yes	Yes	Yes	No	No	No	No		No	Yes	No	No	Yes	Yes	No	No	Yes	No	No	Yes	Yes	No	No	No
250	2021-01-19 20:11:41	5	ESPANISH	2021-01-19 20:05:58	2021-01-19 20:11:41	Yes	No		50	No	No	No	Yes	No	Yes	No	No	Yes	No	No	No	Yes	No	No	Yes	Yes	Yes	No	No	No	No	No		Yes	Yes	Yes	No	Yes	No	No	No	Yes	No	No	Yes	No	No	No	No
251	2021-01-19 20:20:08	5	ESPANISH	2021-01-19 20:10:22	2021-01-19 20:20:08	No	Yes		18	Yes	No	No	No	Yes	No	No	No	No	No	No	No	No	No	Yes	Yes	Yes	Yes	No	Yes	No	No	No		No	Yes	No	No	Yes	No	No	No	No	No	No	Yes	No	No	No	No
252	2021-01-19 20:16:09	5	ESPANISH	2021-01-19 20:10:23	2021-01-19 20:16:09	Yes	No		56	No	No	No	Yes	No	Yes	No	No	Yes	No	No	Yes	No	No	No	Yes	Yes	Yes	No	Yes	No	No	No		Yes	No	No	No	Yes	No	No	No	No	No	No	Yes	No	No	No	No
253	2021-01-19 20:22:58	5	ESPANISH	2021-01-19 20:11:01	2021-01-19 20:22:58	Yes	No		71	No	No	Yes	No	No	Yes	No	No	No	No	Yes	No	No	No	No	Yes	Yes	Yes	Yes	Yes	No	No	No		No	Yes	No	No	Yes	No	No	No	No	No	No	Yes	No	No	No	No
254	2021-01-19 20:23:00	5	ESPANISH	2021-01-19 20:11:27	2021-01-19 20:23:00	No	Yes		18	Yes	No	No	No	Yes	No	No	No	No	No	No	No	Yes	No	No	Yes	Yes	Yes	Yes	No	Yes	No	No		Yes	Yes	No	Yes	No	No	No	No	No	No	No	No	No	Yes	No	Yes
255	2021-01-19 20:23:16	5	ESPANISH	2021-01-19 20:14:41	2021-01-19 20:23:16	No	Yes		20	Yes	No	No	No	Yes	No	No	No	No	No	No	No	Yes	No	No	Yes	Yes	Yes	Yes	No	No	No	No		No	No	Yes	No	Yes	No	No	No	No	Yes	Yes	Yes	No	No	No	No
256	2021-01-19 20:20:49	5	ESPANISH	2021-01-19 20:17:22	2021-01-19 20:20:48	Yes	No		49	No	No	No	Yes	Yes	No	No	No	No	Yes	No	No	No	No	No	Yes	Yes	Yes	No	No	No	No	No		Yes	Yes	No	No	No	No	No	No	Yes	No	No	Yes	No	No	No	No
257	2021-01-19 20:28:11	5	ESPANISH	2021-01-19 20:17:53	2021-01-19 20:28:11	No	Yes		18	Yes	No	No	No	Yes	No	No	No	No	No	No	No	Yes	No	No	Yes	Yes	Yes	No	No	No	No	No		Yes	No	No	No	No	No	No	No	Yes	No	No	No	No	No	No	Yes
262	2021-01-19 20:35:54	5	ESPANISH	2021-01-19 20:27:10	2021-01-19 20:35:54	Yes	No		68	No	No	Yes	No	No	Yes	No	No	Yes	No	No	Yes	No	No	No	Yes	No	Yes	Yes	Yes	No	No	No		No	Yes	No	No	Yes	No	No	No	No	No	No	Yes	No	No	No	No
264	2021-01-19 20:36:33	5	ESPANISH	2021-01-19 20:30:19	2021-01-19 20:36:32	No	Yes		18	Yes	No	No	No	Yes	No	No	No	No	No	No	No	Yes	No	No	Yes	Yes	Yes	Yes	No	No	No	No		Yes	No	No	No	No	No	No	No	No	Yes	No	Yes	Yes	No	No	No
265	2021-01-19 20:41:42	5	ESPANISH	2021-01-19 20:32:58	2021-01-19 20:41:42	No	Yes		43	Yes	No	No	No	Yes	No	No	No	No	No	No	Yes	No	No	No	Yes	Yes	Yes	Yes	Yes	Yes	No	No		Yes	No	Yes	No	No	No	No	No	No	No	No	Yes	No	No	No	Yes
268	2021-01-19 20:40:03	5	ESPANISH	2021-01-19 20:36:15	2021-01-19 20:40:03	Yes	No		24	No	Yes	No	No	Yes	No	No	No	No	No	No	No	No	Yes	No	Yes	Yes	Yes	No	Yes	No	No	No		No	No	Yes	No	No	No	No	No	No	No	No	No	No	Yes	No	Yes
269	2021-01-19 20:46:06	5	ESPANISH	2021-01-19 20:39:25	2021-01-19 20:46:06	No	Yes		20	Yes	No	No	No	Yes	No	No	No	No	No	No	Yes	No	No	No	Yes	Yes	No	No	No	No	No	No		Yes	No	No	No	No	No	No	No	No	No	No	No	No	Yes	No	No
271	2021-01-19 20:55:10	5	ESPANISH	2021-01-19 20:43:01	2021-01-19 20:55:10	No	Yes		70	No	No	No	Yes	No	No	No	Yes	No	Yes	No	No	No	No	No	Yes	Yes	Yes	Yes	No	No	No	No		No	Yes	No	Yes	Yes	No	No	No	No	Yes	No	Yes	No	No	No	No
272	2021-01-19 20:48:55	5	ESPANISH	2021-01-19 20:43:26	2021-01-19 20:48:55	Yes	No		21	Yes	No	No	No	Yes	No	No	No	No	No	Yes	No	No	No	No	No	Yes	Yes	No	No	Yes	No	No		Yes	Yes	Yes	Yes	Yes	No	No	Yes	Yes	Yes	Yes	Yes	No	No	No	No
273	2021-01-19 20:48:43	5	ESPANISH	2021-01-19 20:43:39	2021-01-19 20:48:43	No	Yes		22	Yes	No	No	No	Yes	No	No	No	No	No	No	No	No	Yes	No	Yes	Yes	Yes	Yes	No	No	No	No		Yes	No	No	Yes	No	No	No	No	No	No	No	Yes	No	Yes	No	No
274	2021-01-19 20:53:34	5	ESPANISH	2021-01-19 20:46:25	2021-01-19 20:53:34	No	Yes		41	No	Yes	No	No	Yes	No	No	No	No	No	No	Yes	No	No	No	Yes	Yes	Yes	No	No	No	No	No	I stay little with non-cohabitants and in small groups	Yes	Yes	Yes	No	Yes	Yes	No	No	Yes	Yes	No	Yes	No	No	No	Yes
278	2021-01-19 20:57:19	5	ESPANISH	2021-01-19 20:49:24	2021-01-19 20:57:19	Yes	No		19	Yes	No	No	No	Yes	No	No	No	No	No	No	Yes	No	No	No	Yes	Yes	Yes	No	No	No	No	No	I barely stay with non-cohabitants	Yes	No	No	No	Yes	No	No	No	No	No	No	Yes	No	No	No	No
281	2021-01-19 21:19:09	5	ESPANISH	2021-01-19 21:05:36	2021-01-19 21:19:09	No	Yes		41	No	No	No	Yes	No	Yes	No	No	Yes	No	No	No	No	No	Yes	Yes	Yes	Yes	Yes	Yes	No	No	No		Yes	No	No	No	Yes	No	No	No	No	No	No	Yes	No	No	No	Yes
282	2021-01-19 21:10:28	5	ESPANISH	2021-01-19 21:06:19	2021-01-19 21:10:28	No	Yes		37	No	No	No	Yes	Yes	No	No	No	Yes	No	Yes	No	No	No	No	Yes	No	Yes	Yes	No	No	No	No		Yes	Yes	No	Yes	No	No	No	No	No	No	No	No	No	Yes	No	No
283	2021-01-19 21:21:05	5	ESPANISH	2021-01-19 21:15:41	2021-01-19 21:21:05	No	Yes		37	No	No	No	Yes	No	Yes	No	No	Yes	No	No	No	Yes	No	No	Yes	Yes	Yes	Yes	No	No	No	No		Yes	No	Yes	No	Yes	No	No	No	No	No	No	Yes	No	No	No	No
284	2021-01-19 21:31:06	5	ESPANISH	2021-01-19 21:18:53	2021-01-19 21:31:06	Yes	No		65	No	No	Yes	No	No	Yes	No	No	Yes	No	No	Yes	No	No	No	Yes	Yes	Yes	No	Yes	No	No	No		No	Yes	No	Yes	No	Yes	No	No	No	No	Yes	No	Yes	No	No	No
286	2021-01-19 21:30:20	5	ESPANISH	2021-01-19 21:23:00	2021-01-19 21:30:20	Yes	No		47	No	No	No	Yes	Yes	No	No	No	No	No	No	No	Yes	No	No	No	Yes	Yes	Yes	No	No	No	No		Yes	Yes	No	No	Yes	No	No	No	Yes	No	No	No	No	No	No	No
287	2021-01-19 23:59:20	5	ESPANISH	2021-01-19 21:23:06	2021-01-19 23:59:20	No	Yes		21	Yes	No	No	No	Yes	No	No	No	No	No	No	No	Yes	No	No	Yes	Yes	No	No	Yes	Yes	No	No		Yes	No	No	No	No	No	No	Yes	No	No	No	No	No	No	No	No
288	2021-01-19 21:32:10	5	ESPANISH	2021-01-19 21:23:22	2021-01-19 21:32:10	No	Yes		34	No	Yes	No	No	No	Yes	No	No	No	Yes	No	No	No	No	No	Yes	Yes	Yes	Yes	Yes	No	No	No		Yes	Yes	No	No	No	No	No	No	Yes	No	No	Yes	No	No	Yes	No
289	2021-01-19 21:30:08	5	ESPANISH	2021-01-19 21:24:20	2021-01-19 21:30:08	No	Yes		19	Yes	No	No	No	Yes	No	No	No	No	No	No	No	Yes	No	No	Yes	Yes	Yes	Yes	No	No	No	No		Yes	No	No	No	No	No	No	No	No	No	No	Yes	No	No	No	Yes
290	2021-01-19 21:32:11	5	ESPANISH	2021-01-19 21:24:29	2021-01-19 21:32:11	No	Yes		60	Yes	No	No	No	No	Yes	No	No	No	No	No	Yes	No	No	No	Yes	Yes	Yes	Yes	No	No	No	No		Yes	Yes	Yes	No	No	No	No	Yes	No	No	No	No	No	Yes	No	No
291	2021-01-19 21:34:00	5	ESPANISH	2021-01-19 21:26:40	2021-01-19 21:34:00	No	Yes		70	No	No	Yes	No	No	No	Yes	No	No	Yes	No	No	No	No	No	Yes	Yes	Yes	Yes	No	Yes	No	No		No	Yes	No	No	Yes	No	No	No	No	No	No	Yes	No	No	No	No
292	2021-01-19 21:59:01	5	ESPANISH	2021-01-19 21:27:38	2021-01-19 21:59:01	No	Yes		37	Yes	No	No	No	Yes	No	No	No	No	No	Yes	No	No	No	No	Yes	Yes	Yes	Yes	Yes	No	No	No	I often use hydroalcolic gel outside the home and in public places such as the workplace or university	Yes	No	No	No	Yes	No	No	No	No	No	No	Yes	No	No	No	No
293	2021-01-19 21:33:57	5	ESPANISH	2021-01-19 21:28:59	2021-01-19 21:33:57	No	Yes		39	No	No	No	Yes	Yes	No	No	No	No	No	No	Yes	No	No	No	Yes	Yes	Yes	No	Yes	No	No	No		Yes	No	Yes	No	No	No	No	No	No	No	No	Yes	No	No	No	Yes
294	2021-01-19 21:39:21	5	ESPANISH	2021-01-19 21:31:33	2021-01-19 21:39:21	No	Yes		26	Yes	No	No	No	Yes	No	No	No	No	No	Yes	No	No	No	No	Yes	Yes	Yes	No	No	No	No	No		No	Yes	No	No	No	No	No	No	No	No	No	No	No	Yes	No	Yes
295	2021-01-19 21:45:27	5	ESPANISH	2021-01-19 21:31:55	2021-01-19 21:45:27	No	Yes		21	Yes	No	No	No	Yes	No	No	No	No	No	No	Yes	No	No	No	Yes	Yes	Yes	No	No	No	No	No	I stay less with other people	No	No	No	No	No	No	Yes	No	No	No	No	No	No	Yes	No	No
297	2021-01-19 21:41:51	5	ESPANISH	2021-01-19 21:36:23	2021-01-19 21:41:51	No	Yes		48	Yes	No	No	No	No	Yes	No	No	Yes	No	No	No	Yes	No	No	Yes	Yes	Yes	Yes	Yes	No	No	No		No	No	Yes	Yes	No	No	No	No	No	Yes	Yes	No	No	No	No	No
299	2021-01-19 21:46:30	5	ESPANISH	2021-01-19 21:41:20	2021-01-19 21:46:30	No	Yes		18	Yes	No	No	No	Yes	No	No	No	No	No	No	No	No	Yes	No	Yes	Yes	Yes	No	No	No	No	No		No	No	No	No	Yes	No	No	No	No	No	No	Yes	No	No	No	No
300	2021-01-19 21:47:43	5	ESPANISH	2021-01-19 21:43:36	2021-01-19 21:47:43	Yes	No		23	Yes	No	No	No	Yes	No	No	No	No	No	No	Yes	No	No	No	Yes	Yes	Yes	Yes	Yes	No	No	No		Yes	Yes	No	No	Yes	No	No	No	Yes	No	No	Yes	No	No	Yes	No
301	2021-01-19 21:51:05	5	ESPANISH	2021-01-19 21:45:43	2021-01-19 21:51:05	No	Yes		21	Yes	No	No	No	Yes	No	No	No	No	No	No	No	Yes	No	No	No	Yes	Yes	Yes	No	No	No	No		Yes	No	No	No	No	No	No	No	No	No	No	Yes	No	No	No	No
302	2021-01-19 22:08:26	5	ESPANISH	2021-01-19 21:56:48	2021-01-19 22:08:26	No	Yes		23	No	Yes	No	No	Yes	No	No	No	No	No	No	No	No	No	Yes	Yes	Yes	Yes	No	No	No	No	No		Yes	Yes	Yes	No	Yes	Yes	No	No	No	Yes	No	Yes	Yes	No	No	Yes
303	2021-01-19 22:07:37	5	ESPANISH	2021-01-19 22:00:20	2021-01-19 22:07:37	No	Yes		26	Yes	No	No	No	Yes	No	No	No	No	No	Yes	No	No	No	No	Yes	Yes	Yes	Yes	Yes	No	No	No		Yes	Yes	No	No	Yes	No	No	Yes	No	No	No	Yes	No	No	No	No
304	2021-01-19 22:06:55	5	ESPANISH	2021-01-19 22:01:52	2021-01-19 22:06:55	No	Yes		26	No	Yes	No	No	Yes	No	No	No	No	No	No	Yes	No	No	No	Yes	Yes	Yes	Yes	No	No	No	No		Yes	Yes	No	No	Yes	No	No	No	No	No	No	Yes	Yes	No	No	Yes
305	2021-01-19 22:13:12	5	ESPANISH	2021-01-19 22:09:06	2021-01-19 22:13:12	Yes	No		52	No	Yes	No	No	No	Yes	No	No	Yes	No	No	No	Yes	No	No	Yes	Yes	Yes	Yes	Yes	No	No	No		Yes	No	Yes	No	No	No	No	No	No	Yes	No	Yes	No	No	No	No
306	2021-01-19 22:16:36	5	ESPANISH	2021-01-19 22:09:39	2021-01-19 22:16:36	No	Yes		20	Yes	No	No	No	Yes	No	No	No	No	No	No	No	Yes	No	No	Yes	Yes	No	No	Yes	No	No	No		Yes	Yes	No	No	No	No	No	Yes	Yes	No	No	No	No	No	Yes	No
307	2021-01-19 22:16:51	5	ESPANISH	2021-01-19 22:11:18	2021-01-19 22:16:51	Yes	No		58	No	No	No	Yes	No	Yes	No	No	Yes	No	No	No	No	Yes	No	Yes	Yes	Yes	Yes	Yes	No	No	No		Yes	Yes	No	No	No	No	No	No	Yes	No	No	Yes	No	No	No	No
308	2021-01-19 22:24:29	5	ESPANISH	2021-01-19 22:11:23	2021-01-19 22:24:29	No	Yes		19	Yes	No	No	No	Yes	No	No	No	No	No	No	No	Yes	No	No	Yes	Yes	No	No	No	No	No	No		Yes	Yes	No	No	No	No	No	Yes	Yes	No	No	No	No	Yes	Yes	No
310	2021-01-19 22:19:34	5	ESPANISH	2021-01-19 22:12:43	2021-01-19 22:19:34	No	Yes		19	Yes	No	No	No	Yes	No	No	No	No	No	No	No	Yes	No	No	Yes	Yes	Yes	Yes	No	No	No	No		No	Yes	No	No	No	No	No	No	No	No	No	No	No	Yes	Yes	No
313	2021-01-19 22:35:29	5	ESPANISH	2021-01-19 22:22:24	2021-01-19 22:35:29	Yes	No		56	No	No	No	Yes	No	Yes	No	No	No	No	No	Yes	No	No	No	Yes	Yes	Yes	Yes	Yes	No	No	No		Yes	Yes	No	Yes	No	No	No	Yes	Yes	No	Yes	No	No	No	No	No
314	2021-01-19 22:40:37	5	ESPANISH	2021-01-19 22:30:21	2021-01-19 22:40:37	No	Yes		19	Yes	No	No	No	Yes	No	No	No	No	No	No	No	Yes	No	No	Yes	Yes	No	Yes	No	No	No	No		No	Yes	No	No	No	No	No	No	No	No	No	No	No	Yes	No	Yes
315	2021-01-19 22:35:10	5	ESPANISH	2021-01-19 22:30:38	2021-01-19 22:35:10	Yes	No		20	Yes	No	No	No	Yes	No	No	No	No	No	No	Yes	No	No	No	Yes	Yes	Yes	No	No	No	No	No		No	Yes	No	No	No	No	No	No	No	No	No	Yes	No	No	No	No
317	2021-01-19 22:36:47	5	ESPANISH	2021-01-19 22:32:26	2021-01-19 22:36:47	No	Yes		20	Yes	No	No	No	Yes	No	No	No	No	No	No	No	No	No	Yes	Yes	No	Yes	No	No	No	No	No		Yes	Yes	Yes	No	Yes	No	No	Yes	Yes	Yes	No	Yes	Yes	No	No	No
319	2021-01-19 22:41:38	5	ESPANISH	2021-01-19 22:37:36	2021-01-19 22:41:38	Yes	No		23	No	Yes	No	No	Yes	No	No	No	No	No	No	No	Yes	No	No	Yes	Yes	Yes	Yes	Yes	No	No	No		Yes	Yes	Yes	No	No	No	No	No	Yes	Yes	No	Yes	No	No	No	No
320	2021-01-19 22:53:18	5	ESPANISH	2021-01-19 22:41:10	2021-01-19 22:53:17	No	Yes		24	No	Yes	No	No	Yes	No	No	No	No	No	No	Yes	No	No	No	Yes	Yes	No	No	No	No	No	No	I only keep in touch with cohabitants and fellow graduate students	Yes	No	No	No	No	No	No	No	No	No	No	No	No	Yes	No	No
321	2021-01-19 22:53:15	5	ESPANISH	2021-01-19 22:41:38	2021-01-19 22:53:15	No	Yes		49 years	No	No	No	Yes	No	Yes	No	No	Yes	No	No	No	No	No	Yes	Yes	Yes	Yes	Yes	Yes	No	No	No		Yes	No	Yes	No	No	No	No	No	No	Yes	No	Yes	No	No	No	No
322	2021-01-19 22:47:15	5	ESPANISH	2021-01-19 22:42:17	2021-01-19 22:47:15	Yes	No		29	No	No	No	Yes	Yes	No	No	No	No	Yes	No	No	No	No	No	No	Yes	Yes	No	No	No	No	No		Yes	Yes	No	No	Yes	No	No	No	No	No	No	Yes	No	No	No	Yes
324	2021-01-19 22:49:26	5	ESPANISH	2021-01-19 22:44:00	2021-01-19 22:49:26	No	Yes		25	No	Yes	No	No	Yes	No	No	No	No	No	No	Yes	No	No	No	Yes	Yes	Yes	No	No	No	No	No		Yes	No	No	No	No	No	No	No	No	Yes	No	Yes	No	No	No	No
325	2021-01-19 22:49:39	5	ESPANISH	2021-01-19 22:44:19	2021-01-19 22:49:39	Yes	No		18	Yes	No	No	No	Yes	No	No	No	No	Yes	No	No	No	No	No	Yes	Yes	No	No	No	No	No	No		Yes	Yes	Yes	No	Yes	No	No	No	Yes	Yes	No	Yes	Yes	No	No	No
326	2021-01-19 22:55:13	5	ESPANISH	2021-01-19 22:49:12	2021-01-19 22:55:13	No	Yes		23	Yes	No	No	No	Yes	No	No	No	No	No	No	Yes	No	No	No	Yes	Yes	Yes	No	No	No	No	No		Yes	No	No	No	No	No	No	No	No	No	No	Yes	No	No	No	No
328	2021-01-19 23:02:36	5	ESPANISH	2021-01-19 22:51:46	2021-01-19 23:02:36	Yes	No		72	No	No	Yes	No	No	Yes	No	No	No	No	Yes	No	No	No	No	Yes	Yes	Yes	No	No	No	No	No		No	Yes	No	No	No	No	No	No	No	No	No	Yes	No	No	No	No
331	2021-01-19 23:07:54	5	ESPANISH	2021-01-19 23:00:50	2021-01-19 23:07:54	No	Yes		28	No	No	No	Yes	Yes	No	No	No	No	No	No	No	Yes	No	No	No	Yes	Yes	No	Yes	No	No	No		Yes	No	No	No	Yes	No	No	No	Yes	No	No	Yes	No	No	No	No
332	2021-01-19 23:25:03	5	ESPANISH	2021-01-19 23:17:56	2021-01-19 23:25:03	No	Yes		21	Yes	No	No	No	Yes	No	No	No	No	No	No	No	Yes	No	No	Yes	Yes	Yes	No	No	No	No	No		No	Yes	Yes	No	Yes	No	No	No	Yes	Yes	No	Yes	No	No	No	No
333	2021-01-19 23:26:46	5	ESPANISH	2021-01-19 23:21:40	2021-01-19 23:26:46	No	Yes		25	Yes	No	No	No	Yes	No	No	No	No	No	No	No	No	Yes	No	Yes	Yes	Yes	Yes	No	Yes	No	No		No	No	No	No	Yes	No	No	No	No	No	No	Yes	No	No	No	No
334	2021-01-19 23:42:53	5	ESPANISH	2021-01-19 23:35:46	2021-01-19 23:42:53	No	Yes		21	Yes	No	No	No	Yes	No	No	No	No	No	No	No	Yes	No	No	Yes	Yes	Yes	Yes	No	No	No	No		Yes	Yes	No	No	Yes	No	No	Yes	Yes	No	No	Yes	No	No	No	No
335	2021-01-19 23:45:40	5	ESPANISH	2021-01-19 23:38:36	2021-01-19 23:45:40	Yes	No		25	Yes	No	No	No	Yes	No	No	No	No	No	No	Yes	No	No	No	Yes	Yes	Yes	Yes	Yes	Yes	No	No	I avoid crossing paths with my roommates	No	Yes	No	No	No	No	Yes	No	No	No	No	No	No	Yes	No	No
336	2021-01-19 23:55:25	5	ESPANISH	2021-01-19 23:48:40	2021-01-19 23:55:25	No	Yes		44	No	No	No	Yes	No	No	No	Yes	Yes	No	No	Yes	No	No	No	Yes	Yes	Yes	Yes	Yes	No	No	No		Yes	Yes	No	No	No	No	No	No	Yes	No	No	No	No	No	No	No
337	2021-01-20 00:14:39	5	ESPANISH	2021-01-20 00:09:36	2021-01-20 00:14:39	No	Yes		21	Yes	No	No	No	Yes	No	No	No	No	No	No	No	Yes	No	No	No	Yes	Yes	Yes	Yes	No	No	No		Yes	No	No	No	No	No	No	No	No	No	No	No	No	Yes	No	Yes
338	2021-01-20 01:00:29	5	ESPANISH	2021-01-20 00:53:07	2021-01-20 01:00:29	Yes	No		33	No	No	No	Yes	Yes	No	No	No	No	No	Yes	No	No	No	No	No	Yes	Yes	No	No	No	No	No		Yes	Yes	No	No	Yes	No	No	No	No	No	No	Yes	No	No	No	No
339	2021-01-20 01:07:12	5	ESPANISH	2021-01-20 00:58:18	2021-01-20 01:07:12	Yes	No		64	No	No	Yes	No	No	No	Yes	No	Yes	No	Yes	No	No	No	No	No	Yes	Yes	No	No	No	No	No		No	No	Yes	No	Yes	No	No	No	No	No	No	Yes	No	No	No	No
340	2021-01-20 01:09:52	5	ESPANISH	2021-01-20 01:02:26	2021-01-20 01:09:52	No	Yes		22	Yes	No	No	No	No	Yes	No	No	No	No	Yes	No	No	No	No	Yes	Yes	Yes	No	Yes	No	No	No		No	Yes	No	No	Yes	No	No	No	No	No	No	Yes	No	No	No	No
341	2021-01-20 01:17:03	5	ESPANISH	2021-01-20 01:10:59	2021-01-20 01:17:03	Yes	No		23	Yes	No	No	No	Yes	No	No	No	No	No	No	Yes	No	No	No	Yes	Yes	Yes	No	No	No	No	No		No	Yes	No	No	No	No	No	No	Yes	Yes	No	Yes	No	No	No	No
342	2021-01-20 01:26:25	5	ESPANISH	2021-01-20 01:21:52	2021-01-20 01:26:25	No	Yes		20	Yes	No	No	No	Yes	No	No	No	No	No	No	No	Yes	No	No	Yes	Yes	Yes	Yes	No	No	No	No		Yes	Yes	Yes	No	Yes	No	No	No	Yes	Yes	No	Yes	No	No	No	No
343	2021-01-20 01:41:49	5	ESPANISH	2021-01-20 01:36:38	2021-01-20 01:41:49	No	Yes		24	Yes	No	No	No	Yes	No	No	No	No	No	No	Yes	No	No	No	Yes	Yes	Yes	Yes	No	No	No	No		No	No	No	No	No	No	Yes	No	No	No	No	No	No	Yes	No	No
344	2021-01-20 01:56:24	5	ESPANISH	2021-01-20 01:48:22	2021-01-20 01:56:23	Yes	No		25	No	Yes	No	No	Yes	No	No	No	No	No	Yes	No	No	No	No	Yes	Yes	Yes	Yes	No	No	No	No		No	Yes	No	No	Yes	No	No	No	No	No	No	Yes	No	No	No	No
345	2021-01-20 01:56:05	5	ESPANISH	2021-01-20 01:48:31	2021-01-20 01:56:05	No	Yes		22	Yes	No	No	No	Yes	No	No	No	No	No	No	Yes	No	No	No	Yes	Yes	Yes	Yes	No	No	No	No		Yes	Yes	No	No	No	No	No	No	No	No	No	Yes	No	Yes	No	No
346	2021-01-20 02:02:55	5	ESPANISH	2021-01-20 01:57:37	2021-01-20 02:02:55	No	Yes		18	Yes	No	No	No	No	Yes	No	No	No	No	No	No	No	Yes	No	Yes	Yes	Yes	No	No	No	No	No		No	Yes	Yes	No	Yes	No	No	No	Yes	Yes	No	Yes	No	No	No	No
347	2021-01-20 02:28:26	5	ESPANISH	2021-01-20 02:20:14	2021-01-20 02:28:26	No	Yes		30	No	No	No	Yes	Yes	No	No	No	No	No	Yes	No	No	No	No	Yes	Yes	Yes	No	No	No	No	No		Yes	Yes	No	No	Yes	No	No	No	Yes	No	No	Yes	No	No	No	No
348	2021-01-20 02:34:18	5	ESPANISH	2021-01-20 02:30:22	2021-01-20 02:34:18	No	Yes		18	Yes	No	No	No	Yes	No	No	No	No	No	No	No	Yes	No	No	Yes	Yes	No	No	No	No	No	No		Yes	Yes	No	No	No	No	No	No	No	No	No	Yes	No	No	No	No
349	2021-01-20 07:44:08	5	ESPANISH	2021-01-20 07:34:23	2021-01-20 07:44:08	Yes	No		35	No	No	No	Yes	Yes	No	No	No	No	No	Yes	No	No	No	No	Yes	Yes	Yes	Yes	No	No	No	No		Yes	Yes	Yes	No	Yes	Yes	No	Yes	Yes	Yes	No	Yes	Yes	No	No	No
350	2021-01-20 07:42:41	5	ESPANISH	2021-01-20 07:38:10	2021-01-20 07:42:41	No	Yes		28	No	No	No	Yes	No	Yes	No	No	No	No	Yes	No	No	No	No	Yes	Yes	Yes	Yes	Yes	No	No	No		Yes	Yes	No	No	No	No	No	No	Yes	No	No	No	No	No	No	Yes
351	2021-01-20 07:47:57	5	ESPANISH	2021-01-20 07:42:46	2021-01-20 07:47:57	Yes	No		32	No	No	Yes	No	Yes	No	No	No	Yes	No	Yes	No	No	No	No	Yes	Yes	Yes	Yes	No	No	No	No		Yes	Yes	No	No	No	No	No	Yes	Yes	No	No	No	No	No	Yes	No
352	2021-01-20 07:49:46	5	ESPANISH	2021-01-20 07:45:08	2021-01-20 07:49:46	No	Yes		39	No	No	No	Yes	Yes	No	No	No	No	Yes	No	No	No	No	No	Yes	Yes	Yes	No	No	No	No	No		Yes	Yes	Yes	No	No	Yes	No	No	Yes	Yes	No	Yes	No	No	No	No
353	2021-01-20 07:56:35	5	ESPANISH	2021-01-20 07:49:15	2021-01-20 07:56:35	No	Yes		56	No	No	No	Yes	No	Yes	No	No	Yes	No	No	No	No	Yes	No	Yes	Yes	Yes	No	No	No	No	No	I stay, but much less	Yes	Yes	No	No	No	Yes	No	No	No	No	No	Yes	No	No	No	No
355	2021-01-20 08:10:37	5	ESPANISH	2021-01-20 08:00:56	2021-01-20 08:10:37	No	Yes		56	No	No	No	Yes	No	No	No	Yes	No	No	Yes	No	No	No	No	Yes	Yes	Yes	Yes	No	No	No	No		Yes	No	Yes	No	Yes	No	No	No	No	Yes	No	Yes	No	No	No	Yes
356	2021-01-20 08:06:13	5	ESPANISH	2021-01-20 08:02:37	2021-01-20 08:06:13	Yes	No		23	No	No	No	Yes	Yes	No	No	No	No	No	Yes	No	No	No	No	Yes	Yes	Yes	No	No	No	No	No		Yes	Yes	Yes	No	Yes	Yes	No	No	Yes	Yes	No	Yes	Yes	No	No	No
357	2021-01-20 08:08:47	5	ESPANISH	2021-01-20 08:03:44	2021-01-20 08:08:47	No	Yes		50	No	No	No	Yes	No	Yes	No	No	Yes	No	No	No	No	Yes	No	Yes	Yes	Yes	No	Yes	No	No	No		Yes	No	Yes	No	Yes	No	No	No	No	Yes	No	Yes	No	No	No	No
358	2021-01-20 08:09:25	5	ESPANISH	2021-01-20 08:04:00	2021-01-20 08:09:25	Yes	No		45	No	No	No	Yes	No	Yes	No	No	Yes	No	No	No	Yes	No	No	Yes	Yes	Yes	Yes	Yes	No	No	No		Yes	Yes	No	No	Yes	No	No	No	No	No	No	Yes	No	No	No	Yes
359	2021-01-20 08:13:35	5	ESPANISH	2021-01-20 08:04:11	2021-01-20 08:13:35	Yes	No		25	No	No	No	Yes	Yes	No	No	No	No	No	Yes	No	No	No	No	Yes	Yes	Yes	No	Yes	No	No	No		Yes	Yes	No	No	No	No	No	No	No	No	No	No	No	Yes	No	Yes
360	2021-01-20 08:13:45	5	ESPANISH	2021-01-20 08:08:21	2021-01-20 08:13:45	No	Yes		37	No	No	No	Yes	Yes	No	No	No	No	No	Yes	No	No	No	No	Yes	Yes	Yes	Yes	Yes	Yes	No	No		Yes	No	Yes	No	No	No	No	No	No	No	Yes	No	No	No	No	Yes
361	2021-01-20 08:12:55	5	ESPANISH	2021-01-20 08:08:47	2021-01-20 08:12:55	No	Yes		24	No	No	No	Yes	Yes	No	No	No	No	Yes	No	No	No	No	No	Yes	Yes	Yes	Yes	No	No	No	No		Yes	Yes	No	No	Yes	No	No	No	Yes	No	No	Yes	No	No	No	No
362	2021-01-20 08:21:19	5	ESPANISH	2021-01-20 08:14:56	2021-01-20 08:21:19	No	Yes		22	Yes	No	No	No	Yes	No	No	No	No	No	No	Yes	No	No	No	Yes	Yes	Yes	No	Yes	No	No	No		No	Yes	No	No	No	No	No	No	No	Yes	No	Yes	No	No	No	No
364	2021-01-20 08:28:29	5	ESPANISH	2021-01-20 08:21:57	2021-01-20 08:28:29	No	Yes		32	No	No	No	Yes	Yes	No	No	No	No	No	No	No	Yes	No	No	Yes	Yes	Yes	Yes	Yes	No	No	No		Yes	Yes	No	No	Yes	No	No	No	Yes	No	No	Yes	No	No	No	Yes
365	2021-01-20 08:31:14	5	ESPANISH	2021-01-20 08:22:30	2021-01-20 08:31:14	No	Yes		60	No	No	No	Yes	No	Yes	No	No	Yes	No	No	Yes	No	No	No	Yes	Yes	Yes	Yes	Yes	No	No	No		Yes	Yes	No	No	Yes	No	No	No	No	No	No	Yes	No	No	No	No
366	2021-01-20 08:27:18	5	ESPANISH	2021-01-20 08:22:44	2021-01-20 08:27:18	No	Yes		58	No	No	No	Yes	No	Yes	No	No	No	No	No	Yes	No	No	No	Yes	Yes	Yes	No	No	No	No	No		Yes	No	No	No	No	No	No	No	Yes	No	No	No	No	No	No	No
367	2021-01-20 08:29:15	5	ESPANISH	2021-01-20 08:22:55	2021-01-20 08:29:15	No	Yes		59	No	No	No	Yes	No	Yes	No	No	Yes	No	No	No	No	Yes	No	Yes	Yes	Yes	Yes	Yes	Yes	No	No		Yes	Yes	No	No	No	No	No	No	No	No	No	No	No	Yes	No	No
368	2021-01-20 08:35:20	5	ESPANISH	2021-01-20 08:28:49	2021-01-20 08:35:20	No	Yes		30	Yes	No	No	No	No	Yes	No	No	No	No	Yes	No	No	No	No	Yes	Yes	Yes	No	No	No	No	No		Yes	Yes	Yes	No	No	No	No	No	Yes	Yes	Yes	Yes	No	No	No	No
369	2021-01-20 08:41:41	5	ESPANISH	2021-01-20 08:36:02	2021-01-20 08:41:41	Yes	No		51	No	No	No	Yes	No	Yes	No	No	Yes	No	No	No	No	Yes	No	Yes	Yes	Yes	No	No	No	No	No		Yes	No	No	Yes	Yes	No	No	No	No	No	Yes	Yes	No	No	No	No
371	2021-01-20 08:42:30	5	ESPANISH	2021-01-20 08:36:47	2021-01-20 08:42:30	No	Yes		53	No	No	No	Yes	No	Yes	No	No	Yes	No	No	No	Yes	No	No	Yes	Yes	Yes	Yes	Yes	No	No	No		Yes	No	No	No	Yes	Yes	No	No	Yes	No	No	Yes	Yes	No	Yes	No
372	2021-01-20 08:45:32	5	ESPANISH	2021-01-20 08:37:43	2021-01-20 08:45:32	No	Yes		50	No	No	No	Yes	No	Yes	No	No	Yes	No	No	No	Yes	No	No	Yes	Yes	Yes	Yes	No	No	No	No		Yes	Yes	Yes	No	Yes	No	No	No	No	No	No	Yes	No	No	No	No
373	2021-01-20 08:50:25	5	ESPANISH	2021-01-20 08:40:42	2021-01-20 08:50:25	Yes	No		64	No	No	Yes	No	No	No	No	Yes	No	No	Yes	No	No	No	No	Yes	Yes	Yes	No	No	No	No	No		No	Yes	No	No	Yes	No	No	No	No	No	No	Yes	No	No	No	No
374	2021-01-20 08:50:08	5	ESPANISH	2021-01-20 08:45:33	2021-01-20 08:50:08	No	Yes		35	No	No	No	Yes	No	Yes	No	No	No	No	Yes	No	No	No	No	Yes	Yes	Yes	No	No	Yes	No	No		Yes	Yes	No	No	Yes	No	No	No	Yes	No	No	Yes	No	No	No	No
375	2021-01-20 08:53:03	5	ESPANISH	2021-01-20 08:47:44	2021-01-20 08:53:03	No	Yes		53	No	No	No	Yes	No	Yes	No	No	Yes	No	No	Yes	No	No	No	Yes	Yes	Yes	Yes	No	No	No	No		Yes	No	Yes	No	Yes	Yes	No	No	No	No	No	Yes	No	No	No	No
376	2021-01-20 08:54:23	5	ESPANISH	2021-01-20 08:49:48	2021-01-20 08:54:23	Yes	No		60	No	No	No	Yes	No	Yes	No	No	Yes	No	No	Yes	No	No	No	No	Yes	Yes	Yes	Yes	No	No	No		Yes	No	No	No	No	No	No	No	No	No	No	No	No	Yes	Yes	No
377	2021-01-20 08:54:47	5	ESPANISH	2021-01-20 08:50:07	2021-01-20 08:54:47	No	Yes		57	No	No	No	Yes	Yes	No	No	No	Yes	No	Yes	No	No	No	No	Yes	Yes	Yes	Yes	Yes	Yes	No	No		Yes	Yes	No	No	No	No	No	No	No	No	No	No	No	Yes	No	No
378	2021-01-20 08:55:35	5	ESPANISH	2021-01-20 08:51:12	2021-01-20 08:55:34	No	Yes		30	No	No	No	Yes	Yes	No	No	No	No	No	Yes	No	No	No	No	Yes	Yes	Yes	Yes	No	No	No	No		Yes	Yes	No	No	No	No	No	No	Yes	No	No	Yes	No	No	No	No
379	2021-01-20 08:54:38	5	ESPANISH	2021-01-20 08:51:24	2021-01-20 08:54:38	No	Yes		31	No	No	No	Yes	Yes	No	No	No	No	No	Yes	No	No	No	No	Yes	Yes	No	No	No	No	No	No		Yes	Yes	No	No	No	No	No	No	No	No	No	Yes	No	No	No	No
380	2021-01-20 08:58:59	5	ESPANISH	2021-01-20 08:51:53	2021-01-20 08:58:59	No	Yes		63	No	No	Yes	No	Yes	No	No	No	No	Yes	No	No	No	No	No	Yes	Yes	Yes	Yes	No	No	No	No		No	No	Yes	No	Yes	No	No	No	No	No	No	Yes	No	No	No	No
381	2021-01-20 09:01:05	5	ESPANISH	2021-01-20 08:56:08	2021-01-20 09:01:05	Yes	No		44	No	No	No	Yes	No	Yes	No	No	Yes	No	No	No	No	Yes	No	Yes	Yes	Yes	No	No	No	No	No		Yes	Yes	Yes	Yes	Yes	No	No	No	Yes	Yes	Yes	Yes	Yes	No	No	No
382	2021-01-20 09:03:56	5	ESPANISH	2021-01-20 08:57:10	2021-01-20 09:03:56	No	Yes		53	No	No	No	Yes	No	Yes	No	No	No	No	Yes	No	No	No	No	Yes	Yes	Yes	Yes	No	No	No	No		Yes	Yes	No	No	Yes	No	No	No	Yes	No	No	Yes	No	No	No	No
383	2021-01-20 09:03:44	5	ESPANISH	2021-01-20 08:58:50	2021-01-20 09:03:44	No	Yes		34	No	No	No	Yes	No	Yes	No	No	No	No	Yes	No	No	No	No	Yes	Yes	Yes	No	No	No	No	No		Yes	No	No	No	No	No	No	No	No	Yes	No	Yes	No	No	No	No
384	2021-01-20 09:03:32	5	ESPANISH	2021-01-20 08:59:26	2021-01-20 09:03:32	No	Yes		32	No	No	No	Yes	Yes	No	No	No	No	No	Yes	No	No	No	No	Yes	Yes	Yes	No	No	No	No	No		Yes	Yes	No	No	Yes	No	No	No	Yes	No	No	Yes	No	No	No	No
385	2021-01-20 09:07:40	5	ESPANISH	2021-01-20 09:02:48	2021-01-20 09:07:40	No	Yes		33	No	No	No	Yes	Yes	No	No	No	No	No	Yes	No	No	No	No	Yes	Yes	Yes	No	No	No	No	No		Yes	Yes	Yes	No	No	No	No	No	Yes	Yes	No	No	No	No	No	No
386	2021-01-20 09:13:18	5	ESPANISH	2021-01-20 09:03:10	2021-01-20 09:13:18	No	Yes		55	No	No	No	Yes	No	Yes	No	No	Yes	No	No	No	Yes	No	No	Yes	Yes	Yes	No	No	No	No	No		Yes	No	Yes	Yes	No	No	No	No	Yes	No	Yes	No	Yes	No	No	No
387	2021-01-20 09:12:00	5	ESPANISH	2021-01-20 09:03:41	2021-01-20 09:12:00	Yes	No		68	No	No	No	Yes	No	Yes	No	No	Yes	No	Yes	No	No	No	No	Yes	Yes	Yes	Yes	No	No	No	No		Yes	Yes	No	Yes	Yes	No	No	No	No	Yes	Yes	Yes	No	No	No	No
388	2021-01-20 09:11:55	5	ESPANISH	2021-01-20 09:06:58	2021-01-20 09:11:55	Yes	No		56	No	No	No	Yes	No	No	Yes	No	No	Yes	No	No	No	No	No	Yes	Yes	Yes	Yes	Yes	No	No	No		Yes	Yes	No	Yes	Yes	No	No	No	No	No	Yes	Yes	No	No	No	No
390	2021-01-20 09:12:41	5	ESPANISH	2021-01-20 09:09:05	2021-01-20 09:12:41	Yes	No		24	Yes	No	No	No	Yes	No	No	No	No	No	No	No	Yes	No	No	Yes	Yes	Yes	No	No	No	No	No		Yes	Yes	Yes	No	No	No	No	No	No	No	No	Yes	No	No	No	Yes
391	2021-01-20 09:13:51	5	ESPANISH	2021-01-20 09:10:13	2021-01-20 09:13:51	No	Yes		23	Yes	No	No	No	Yes	No	No	No	No	No	No	No	Yes	No	No	No	Yes	Yes	No	No	No	No	No		Yes	Yes	Yes	No	Yes	No	No	No	No	Yes	Yes	Yes	No	No	No	Yes
392	2021-01-20 09:26:20	5	ESPANISH	2021-01-20 09:10:19	2021-01-20 09:26:20	Yes	No		42	No	No	No	Yes	No	Yes	No	No	Yes	No	No	Yes	No	No	No	Yes	Yes	Yes	Yes	Yes	No	No	No	Be very careful with objects that enter the house (packages, purchases, etc.)	Yes	Yes	No	No	No	No	No	No	Yes	No	No	Yes	No	No	No	Yes
393	2021-01-20 09:40:40	5	ESPANISH	2021-01-20 09:10:33	2021-01-20 09:40:40	No	Yes		40	No	No	No	Yes	No	Yes	No	No	Yes	No	No	No	Yes	No	No	Yes	Yes	Yes	No	No	No	No	No	I only stay with my family bubble group	Yes	Yes	No	No	Yes	Yes	No	No	Yes	Yes	No	Yes	Yes	No	No	No
394	2021-01-20 09:16:42	5	ESPANISH	2021-01-20 09:12:03	2021-01-20 09:16:42	No	Yes		56	No	No	No	Yes	No	Yes	No	No	No	No	Yes	No	No	No	No	No	Yes	Yes	Yes	Yes	Yes	No	No	TELECOMMUTING	No	No	No	No	No	No	Yes	No	No	No	No	Yes	No	No	No	No
395	2021-01-20 09:20:54	5	ESPANISH	2021-01-20 09:12:21	2021-01-20 09:20:54	No	Yes		32	No	Yes	No	No	Yes	No	No	No	No	No	Yes	No	No	No	No	Yes	Yes	Yes	No	No	No	No	No		Yes	No	Yes	No	No	No	No	No	No	No	No	Yes	No	No	No	No
396	2021-01-20 09:33:29	5	ESPANISH	2021-01-20 09:13:07	2021-01-20 09:33:29	No	Yes		48	No	No	No	Yes	No	Yes	No	No	Yes	No	No	No	Yes	No	No	Yes	Yes	Yes	Yes	No	No	No	No		Yes	No	No	No	No	No	No	No	No	Yes	No	Yes	No	No	No	No
397	2021-01-20 09:20:39	5	ESPANISH	2021-01-20 09:15:25	2021-01-20 09:20:39	No	Yes		52	No	No	No	Yes	No	Yes	No	No	Yes	No	No	No	Yes	No	No	Yes	Yes	Yes	No	Yes	No	No	No		Yes	No	Yes	No	Yes	No	No	No	No	No	No	Yes	No	No	No	No
399	2021-01-20 09:26:40	5	ESPANISH	2021-01-20 09:16:58	2021-01-20 09:26:40	No	Yes		48	No	No	No	Yes	No	Yes	No	No	Yes	No	No	No	Yes	No	No	Yes	Yes	Yes	No	No	No	No	No	As much as possible, I try to keep the windows open when I am in closed places with more people	Yes	No	Yes	No	No	Yes	No	No	No	Yes	Yes	No	No	No	No	No
401	2021-01-20 09:22:13	5	ESPANISH	2021-01-20 09:17:48	2021-01-20 09:22:13	No	Yes		47	No	No	No	Yes	No	Yes	No	No	Yes	No	No	No	No	Yes	No	No	Yes	Yes	No	No	No	No	No		Yes	Yes	Yes	No	Yes	No	No	No	Yes	Yes	No	Yes	No	No	No	No
402	2021-01-20 09:23:48	5	ESPANISH	2021-01-20 09:19:10	2021-01-20 09:23:48	No	Yes		53	No	No	No	Yes	Yes	No	No	No	No	Yes	No	No	No	No	No	Yes	Yes	Yes	Yes	No	No	No	No		Yes	No	Yes	No	Yes	No	No	No	No	Yes	No	Yes	No	No	No	No
404	2021-01-20 09:28:54	5	ESPANISH	2021-01-20 09:23:35	2021-01-20 09:28:54	Yes	No		62	No	No	Yes	No	No	Yes	No	No	Yes	No	No	Yes	No	No	No	Yes	Yes	Yes	Yes	Yes	No	No	No		Yes	No	No	No	Yes	No	No	No	No	No	No	Yes	No	No	No	No
405	2021-01-20 09:29:31	5	ESPANISH	2021-01-20 09:24:12	2021-01-20 09:29:31	Yes	No		24	No	No	No	Yes	Yes	No	No	No	No	No	Yes	No	No	No	No	Yes	Yes	Yes	No	No	No	No	No		Yes	Yes	Yes	No	No	Yes	No	No	Yes	Yes	No	Yes	Yes	No	No	No
406	2021-01-20 09:35:04	5	ESPANISH	2021-01-20 09:29:30	2021-01-20 09:35:04	Yes	No		20	Yes	No	No	No	Yes	No	No	No	No	No	No	No	Yes	No	No	No	Yes	No	No	No	No	No	No		Yes	No	No	No	No	No	No	No	No	No	No	Yes	No	No	No	No
408	2021-01-20 09:43:12	5	ESPANISH	2021-01-20 09:30:18	2021-01-20 09:43:12	Yes	No		43	No	No	No	Yes	Yes	No	No	No	No	Yes	No	No	No	No	No	Yes	Yes	Yes	Yes	No	No	No	No	I stay little with non-cohabitants	Yes	No	Yes	No	No	No	No	No	No	No	No	No	No	Yes	No	No
410	2021-01-20 09:37:05	5	ESPANISH	2021-01-20 09:33:20	2021-01-20 09:37:05	No	Yes		57	No	No	No	Yes	No	Yes	No	No	Yes	No	No	Yes	No	No	No	Yes	Yes	Yes	Yes	No	No	No	No		Yes	Yes	No	No	No	Yes	No	No	No	Yes	No	Yes	No	No	No	No
411	2021-01-20 09:41:02	5	ESPANISH	2021-01-20 09:35:47	2021-01-20 09:41:02	No	Yes		18	Yes	No	No	No	Yes	No	No	No	No	No	Yes	No	No	No	No	Yes	Yes	Yes	Yes	No	No	No	No		Yes	No	No	No	No	No	No	No	No	No	No	Yes	No	No	No	Yes
412	2021-01-20 09:44:06	5	ESPANISH	2021-01-20 09:38:55	2021-01-20 09:44:06	No	Yes		44	No	No	No	Yes	No	Yes	No	No	Yes	No	No	Yes	No	No	No	Yes	Yes	Yes	No	Yes	No	No	No		Yes	Yes	Yes	No	Yes	No	No	No	No	No	No	Yes	No	Yes	No	No
413	2021-01-20 09:47:01	5	ESPANISH	2021-01-20 09:41:14	2021-01-20 09:47:01	Yes	No		41	No	No	No	Yes	No	Yes	No	No	Yes	No	No	No	Yes	No	No	Yes	Yes	Yes	Yes	No	Yes	No	No		Yes	Yes	No	No	No	No	No	No	Yes	Yes	No	No	No	No	No	Yes
414	2021-01-20 09:49:32	5	ESPANISH	2021-01-20 09:44:58	2021-01-20 09:49:32	No	Yes		35	No	No	No	Yes	Yes	No	No	No	No	No	No	Yes	No	No	No	Yes	Yes	Yes	Yes	Yes	No	No	No		Yes	Yes	No	No	No	No	No	No	Yes	No	No	No	No	No	No	No
415	2021-01-20 09:53:13	5	ESPANISH	2021-01-20 09:45:45	2021-01-20 09:53:13	Yes	No		39	No	No	No	Yes	No	Yes	No	No	Yes	No	No	No	Yes	No	No	Yes	Yes	Yes	No	No	No	No	No	I use alcoholic gels to disinfect	Yes	Yes	No	No	Yes	No	No	No	Yes	No	No	Yes	No	No	No	No
416	2021-01-20 09:52:14	5	ESPANISH	2021-01-20 09:47:11	2021-01-20 09:52:14	No	Yes		52	No	No	No	Yes	No	Yes	No	No	No	No	Yes	No	No	No	No	Yes	Yes	Yes	No	No	No	No	No		Yes	Yes	No	No	Yes	No	No	No	Yes	No	No	Yes	No	No	No	No
417	2021-01-20 09:57:43	5	ESPANISH	2021-01-20 09:52:26	2021-01-20 09:57:43	Yes	No		40	No	No	No	Yes	No	Yes	No	No	Yes	No	No	No	Yes	No	No	Yes	Yes	Yes	No	No	No	No	No		Yes	Yes	No	No	No	No	No	No	No	No	No	Yes	No	No	No	No
418	2021-01-20 10:15:18	5	ESPANISH	2021-01-20 09:53:04	2021-01-20 10:15:18	No	Yes		37	No	No	No	Yes	Yes	No	No	No	No	No	Yes	No	No	No	No	Yes	Yes	Yes	No	No	No	No	No		Yes	Yes	No	No	No	No	No	No	No	No	No	Yes	No	No	No	No
419	2021-01-20 09:59:47	5	ESPANISH	2021-01-20 09:53:27	2021-01-20 09:59:47	No	Yes		20	Yes	No	No	No	Yes	No	No	No	No	No	No	Yes	No	No	No	Yes	Yes	Yes	Yes	No	No	No	No		No	Yes	No	No	Yes	No	No	No	Yes	Yes	No	Yes	No	No	No	Yes
420	2021-01-20 10:02:59	5	ESPANISH	2021-01-20 09:54:28	2021-01-20 10:02:59	No	Yes		58	No	No	No	Yes	Yes	No	No	No	No	Yes	No	No	No	No	No	Yes	Yes	Yes	No	Yes	No	No	No		Yes	Yes	No	No	No	No	No	No	Yes	Yes	No	Yes	No	No	No	No
421	2021-01-20 10:01:48	5	ESPANISH	2021-01-20 09:54:53	2021-01-20 10:01:48	No	Yes		45	No	No	No	Yes	Yes	No	No	No	No	Yes	No	No	No	No	No	Yes	Yes	No	No	No	No	No	No		Yes	Yes	No	Yes	No	No	No	No	No	No	Yes	Yes	No	No	No	Yes
422	2021-01-20 10:03:57	5	ESPANISH	2021-01-20 09:55:00	2021-01-20 10:03:57	No	Yes		18	Yes	No	No	No	Yes	No	No	No	No	No	No	No	Yes	No	No	Yes	Yes	Yes	Yes	No	No	No	No		No	No	Yes	No	No	No	No	No	No	No	No	Yes	No	No	No	No
423	2021-01-20 10:03:14	5	ESPANISH	2021-01-20 09:56:06	2021-01-20 10:03:14	No	Yes		50	No	No	No	Yes	Yes	No	No	No	No	Yes	No	No	No	No	No	Yes	Yes	Yes	Yes	Yes	No	No	No		Yes	Yes	Yes	No	No	No	No	No	No	No	Yes	No	No	No	No	No
424	2021-01-20 10:01:59	5	ESPANISH	2021-01-20 09:57:18	2021-01-20 10:01:59	No	Yes		33	No	No	No	Yes	Yes	No	No	No	No	No	Yes	No	No	No	No	Yes	Yes	Yes	Yes	No	No	No	No		Yes	Yes	Yes	No	Yes	No	No	No	Yes	Yes	No	Yes	No	No	No	No
425	2021-01-20 10:11:02	5	ESPANISH	2021-01-20 10:02:02	2021-01-20 10:11:02	No	Yes		62	No	No	No	Yes	No	No	Yes	No	Yes	Yes	No	No	No	No	No	Yes	Yes	Yes	Yes	No	No	No	No		Yes	Yes	Yes	Yes	Yes	No	No	No	No	No	Yes	Yes	No	No	No	No
426	2021-01-20 10:10:43	5	ESPANISH	2021-01-20 10:02:58	2021-01-20 10:10:43	Yes	No		41	No	No	No	Yes	No	Yes	No	No	Yes	No	No	No	Yes	No	No	Yes	Yes	Yes	Yes	No	No	No	No	I only stay with direct family	Yes	Yes	No	Yes	No	No	No	Yes	No	Yes	Yes	Yes	No	No	No	No
427	2021-01-20 10:09:39	5	ESPANISH	2021-01-20 10:03:49	2021-01-20 10:09:39	No	Yes		34	No	No	No	Yes	No	Yes	No	No	Yes	No	No	No	Yes	No	No	Yes	Yes	Yes	Yes	Yes	No	No	No		Yes	Yes	No	No	No	No	No	No	No	No	No	Yes	No	Yes	No	No
428	2021-01-20 10:11:34	5	ESPANISH	2021-01-20 10:05:53	2021-01-20 10:11:34	No	Yes		26	No	No	No	Yes	Yes	No	No	No	No	No	Yes	No	No	No	No	Yes	Yes	Yes	Yes	No	No	No	No		Yes	Yes	No	No	No	No	No	No	Yes	No	No	Yes	No	No	No	No
430	2021-01-20 10:16:24	5	ESPANISH	2021-01-20 10:08:25	2021-01-20 10:16:24	No	Yes		55	No	No	No	Yes	No	Yes	No	No	No	No	No	Yes	No	No	No	Yes	Yes	Yes	Yes	No	No	No	No		Yes	Yes	No	No	Yes	No	No	No	No	No	No	Yes	No	No	No	No
431	2021-01-20 10:16:44	5	ESPANISH	2021-01-20 10:08:39	2021-01-20 10:16:44	No	Yes		58	No	No	No	Yes	No	No	Yes	No	Yes	No	No	No	Yes	No	No	Yes	No	Yes	Yes	Yes	No	No	No		Yes	Yes	No	No	No	Yes	No	No	No	No	No	Yes	No	No	Yes	No
432	2021-01-20 10:16:06	5	ESPANISH	2021-01-20 10:10:58	2021-01-20 10:16:06	Yes	No		25	No	Yes	No	No	Yes	No	No	No	No	No	No	Yes	No	No	No	Yes	Yes	Yes	Yes	No	No	No	No		Yes	No	No	No	Yes	No	No	No	No	No	No	No	No	Yes	No	No
433	2021-01-20 10:16:53	5	ESPANISH	2021-01-20 10:11:20	2021-01-20 10:16:53	No	Yes		44	No	No	No	Yes	No	No	No	Yes	Yes	No	No	Yes	No	No	No	Yes	Yes	Yes	Yes	No	No	No	No		Yes	Yes	No	Yes	No	No	No	No	Yes	No	Yes	Yes	No	No	No	No
434	2021-01-20 10:16:13	5	ESPANISH	2021-01-20 10:12:11	2021-01-20 10:16:13	No	Yes		50	No	No	No	Yes	No	Yes	No	No	Yes	No	No	No	Yes	No	No	Yes	Yes	Yes	Yes	No	No	No	No		Yes	Yes	No	No	No	No	No	No	No	No	No	Yes	No	No	No	No
435	2021-01-20 10:19:07	5	ESPANISH	2021-01-20 10:13:29	2021-01-20 10:19:07	No	Yes		21	Yes	No	No	No	Yes	No	No	No	No	No	No	No	Yes	No	No	No	Yes	Yes	No	No	No	No	No		Yes	No	Yes	No	Yes	No	No	No	No	Yes	No	Yes	No	No	No	No
436	2021-01-20 10:29:14	5	ESPANISH	2021-01-20 10:16:31	2021-01-20 10:29:14	No	Yes		59	No	No	No	Yes	No	Yes	No	No	Yes	No	No	No	Yes	No	No	Yes	Yes	Yes	Yes	No	No	No	No		Yes	Yes	No	Yes	No	No	No	No	No	No	No	No	No	Yes	No	No
437	2021-01-20 10:21:03	5	ESPANISH	2021-01-20 10:16:53	2021-01-20 10:21:03	Yes	No		41	No	No	No	Yes	No	Yes	No	No	Yes	No	No	Yes	No	No	No	No	Yes	Yes	No	Yes	No	No	No		Yes	No	Yes	Yes	Yes	No	No	No	No	Yes	Yes	Yes	No	No	No	Yes
438	2021-01-20 10:24:10	5	ESPANISH	2021-01-20 10:16:56	2021-01-20 10:24:10	No	Yes		42	No	No	No	Yes	Yes	No	No	No	Yes	No	No	Yes	No	No	No	Yes	Yes	Yes	Yes	Yes	No	No	No		Yes	Yes	No	Yes	No	No	No	No	No	No	No	No	No	Yes	Yes	No
439	2021-01-20 10:24:08	5	ESPANISH	2021-01-20 10:18:43	2021-01-20 10:24:08	Yes	No		22	Yes	No	No	No	Yes	No	No	No	No	No	No	No	No	No	Yes	Yes	Yes	No	No	No	No	No	No		Yes	Yes	No	No	No	No	No	No	Yes	No	No	Yes	No	No	Yes	No
440	2021-01-20 10:31:42	5	ESPANISH	2021-01-20 10:24:49	2021-01-20 10:31:42	No	Yes		45	No	No	No	Yes	No	Yes	No	No	Yes	No	No	Yes	No	No	No	Yes	Yes	Yes	No	No	No	No	No		Yes	Yes	Yes	No	Yes	No	No	No	Yes	Yes	No	Yes	Yes	No	No	No
442	2021-01-20 10:38:13	5	ESPANISH	2021-01-20 10:29:57	2021-01-20 10:38:13	Yes	No		49	No	No	No	Yes	No	Yes	No	No	Yes	No	No	No	Yes	No	No	Yes	Yes	Yes	Yes	Yes	No	No	No	I avoid bars and closed spaces	Yes	No	No	Yes	Yes	No	No	No	No	No	Yes	Yes	No	No	No	No
443	2021-01-20 10:45:36	5	ESPANISH	2021-01-20 10:30:59	2021-01-20 10:45:36	No	Yes		66	No	No	No	Yes	No	Yes	No	No	No	No	Yes	No	No	No	No	Yes	Yes	Yes	No	No	No	No	No		Yes	No	Yes	No	Yes	No	No	No	No	No	No	Yes	No	No	No	Yes
444	2021-01-20 10:38:09	5	ESPANISH	2021-01-20 10:31:34	2021-01-20 10:38:09	Yes	No		32	No	No	No	Yes	Yes	No	No	No	No	No	No	No	Yes	No	No	Yes	Yes	Yes	Yes	No	No	No	No		Yes	Yes	No	No	Yes	No	No	No	Yes	No	No	Yes	No	No	No	No
445	2021-01-20 10:39:51	5	ESPANISH	2021-01-20 10:34:32	2021-01-20 10:39:51	No	Yes		46	No	No	No	Yes	No	Yes	No	No	Yes	No	No	No	Yes	No	No	Yes	Yes	Yes	No	Yes	No	No	No		Yes	Yes	No	No	No	No	No	No	No	No	No	Yes	No	No	No	No
446	2021-01-20 10:40:24	5	ESPANISH	2021-01-20 10:36:47	2021-01-20 10:40:24	No	Yes		20	Yes	No	No	No	Yes	No	No	No	No	No	No	Yes	No	No	No	Yes	Yes	Yes	Yes	No	No	No	No		No	Yes	No	No	No	No	No	No	No	No	No	Yes	No	No	No	Yes
447	2021-01-20 10:46:35	5	ESPANISH	2021-01-20 10:39:55	2021-01-20 10:46:35	No	Yes		41	Yes	No	No	No	No	Yes	No	No	Yes	No	No	No	Yes	No	No	Yes	Yes	Yes	Yes	Yes	No	No	No		Yes	Yes	No	Yes	Yes	No	No	No	Yes	No	Yes	Yes	No	No	No	No
448	2021-01-20 10:45:56	5	ESPANISH	2021-01-20 10:41:18	2021-01-20 10:45:56	Yes	No		50	No	No	No	Yes	No	Yes	No	No	No	No	Yes	No	No	No	No	Yes	Yes	Yes	No	No	No	No	No		Yes	Yes	Yes	No	Yes	No	No	No	Yes	Yes	No	Yes	No	No	No	No
449	2021-01-20 10:50:01	5	ESPANISH	2021-01-20 10:41:52	2021-01-20 10:50:01	No	Yes		20	Yes	No	No	No	Yes	No	No	No	No	No	No	Yes	No	No	No	Yes	Yes	Yes	Yes	No	No	No	No		Yes	Yes	Yes	No	No	No	No	No	Yes	Yes	No	Yes	Yes	No	No	No
450	2021-01-20 10:51:08	5	ESPANISH	2021-01-20 10:44:51	2021-01-20 10:51:08	No	Yes		46	No	No	No	Yes	No	Yes	No	No	Yes	No	No	Yes	No	No	No	Yes	Yes	Yes	Yes	Yes	No	No	No		Yes	No	No	No	No	No	No	No	Yes	No	No	Yes	No	No	No	No
451	2021-01-20 10:58:01	5	ESPANISH	2021-01-20 10:51:41	2021-01-20 10:58:01	Yes	No		56	No	No	No	Yes	No	Yes	No	No	Yes	No	Yes	No	No	No	No	Yes	Yes	Yes	Yes	Yes	No	No	No		Yes	Yes	No	Yes	No	No	No	No	No	No	Yes	Yes	No	No	No	No
452	2021-01-20 10:59:37	5	ESPANISH	2021-01-20 10:54:21	2021-01-20 10:59:37	No	Yes		21	Yes	No	No	No	Yes	No	No	No	No	No	No	Yes	No	No	No	Yes	Yes	Yes	No	No	No	No	No		Yes	Yes	No	No	Yes	No	No	No	Yes	No	No	Yes	No	No	No	No
453	2021-01-20 11:02:32	5	ESPANISH	2021-01-20 10:55:33	2021-01-20 11:02:32	No	Yes		64	No	No	No	Yes	No	No	Yes	No	No	Yes	No	No	No	No	No	No	Yes	Yes	Yes	No	No	No	No		Yes	No	Yes	No	Yes	No	No	No	No	No	No	Yes	No	No	No	No
454	2021-01-20 11:02:57	5	ESPANISH	2021-01-20 10:56:54	2021-01-20 11:02:57	No	Yes		24	No	No	No	Yes	Yes	No	No	No	No	Yes	No	No	No	No	No	Yes	Yes	Yes	Yes	Yes	No	No	No		Yes	Yes	No	No	No	No	No	No	Yes	No	No	Yes	No	No	No	No
455	2021-01-20 11:03:57	5	ESPANISH	2021-01-20 10:57:27	2021-01-20 11:03:57	No	Yes		28	No	No	No	Yes	Yes	No	No	No	No	No	No	Yes	No	No	No	No	Yes	Yes	Yes	No	No	No	No		Yes	Yes	Yes	No	Yes	No	No	No	No	Yes	No	Yes	No	No	No	No
456	2021-01-20 11:07:02	5	ESPANISH	2021-01-20 11:02:34	2021-01-20 11:07:02	Yes	No		43	No	No	No	Yes	No	Yes	No	No	Yes	No	No	No	No	Yes	No	Yes	Yes	Yes	No	Yes	No	No	No		Yes	Yes	Yes	Yes	Yes	No	No	No	Yes	Yes	Yes	Yes	No	No	No	Yes
457	2021-01-20 11:09:08	5	ESPANISH	2021-01-20 11:03:49	2021-01-20 11:09:08	No	Yes		26	Yes	No	No	No	Yes	No	No	No	No	No	Yes	No	No	No	No	Yes	Yes	Yes	No	Yes	Yes	No	No		Yes	Yes	No	No	No	No	No	No	No	No	No	No	No	Yes	No	No
458	2021-01-20 11:15:56	5	ESPANISH	2021-01-20 11:08:44	2021-01-20 11:15:56	No	Yes		36	No	No	No	Yes	No	Yes	No	No	Yes	No	No	Yes	No	No	No	Yes	Yes	Yes	Yes	Yes	No	No	No		Yes	No	Yes	No	Yes	No	No	No	No	No	No	Yes	No	No	No	No
459	2021-01-20 11:15:44	5	ESPANISH	2021-01-20 11:11:26	2021-01-20 11:15:44	No	Yes		36	No	No	No	Yes	No	Yes	No	No	Yes	No	No	Yes	No	No	No	Yes	Yes	Yes	Yes	Yes	No	No	No		Yes	No	No	No	No	No	No	No	No	No	No	Yes	No	No	Yes	No
460	2021-01-20 11:18:01	5	ESPANISH	2021-01-20 11:13:14	2021-01-20 11:18:01	Yes	No		22	Yes	No	No	No	Yes	No	No	No	No	No	No	Yes	No	No	No	Yes	Yes	Yes	No	No	No	No	No		No	Yes	Yes	No	Yes	No	No	No	Yes	Yes	No	Yes	No	No	Yes	No
461	2021-01-20 11:23:44	5	ESPANISH	2021-01-20 11:14:32	2021-01-20 11:23:44	Yes	No		24	Yes	No	No	No	Yes	No	No	No	Yes	No	No	Yes	No	No	No	Yes	Yes	Yes	No	No	No	No	No		No	Yes	No	No	No	No	No	No	No	No	No	Yes	No	No	No	Yes
462	2021-01-20 11:21:55	5	ESPANISH	2021-01-20 11:17:22	2021-01-20 11:21:55	Yes	No		44	No	No	No	Yes	No	Yes	No	No	Yes	No	No	Yes	No	No	No	Yes	Yes	Yes	Yes	Yes	Yes	No	No		Yes	Yes	No	No	No	No	No	No	No	No	No	Yes	No	No	No	No
464	2021-01-20 11:41:46	5	ESPANISH	2021-01-20 11:33:21	2021-01-20 11:41:46	Yes	No		70	No	No	Yes	No	No	Yes	No	No	No	No	Yes	No	No	No	No	Yes	Yes	Yes	Yes	Yes	No	No	No		No	Yes	No	No	Yes	No	No	No	No	No	No	Yes	No	No	No	Yes
465	2021-01-20 11:41:23	5	ESPANISH	2021-01-20 11:33:34	2021-01-20 11:41:23	No	Yes		31	No	No	No	Yes	Yes	No	No	No	No	No	Yes	No	No	No	No	Yes	Yes	Yes	No	Yes	No	No	No		Yes	Yes	No	No	No	No	No	No	No	No	No	Yes	No	No	No	No
466	2021-01-20 11:38:59	5	ESPANISH	2021-01-20 11:35:25	2021-01-20 11:38:59	No	Yes		35	No	No	No	Yes	No	Yes	No	No	Yes	No	No	No	Yes	No	No	Yes	Yes	Yes	Yes	No	No	No	No		Yes	No	Yes	Yes	Yes	No	No	No	No	Yes	No	Yes	No	No	No	Yes
468	2021-01-20 11:42:45	5	ESPANISH	2021-01-20 11:36:34	2021-01-20 11:42:45	No	Yes		42	No	No	No	Yes	No	Yes	No	No	No	No	Yes	No	No	No	No	Yes	Yes	Yes	No	Yes	No	No	No		Yes	Yes	No	No	No	No	No	No	Yes	No	No	No	No	No	No	No
469	2021-01-20 11:52:01	5	ESPANISH	2021-01-20 11:36:41	2021-01-20 11:52:01	No	Yes		38	Yes	No	No	No	Yes	No	No	No	Yes	No	No	Yes	No	No	No	Yes	Yes	Yes	Yes	Yes	No	No	No		No	Yes	Yes	No	Yes	No	No	No	No	No	No	Yes	No	No	No	No
470	2021-01-20 11:45:50	5	ESPANISH	2021-01-20 11:38:04	2021-01-20 11:45:50	No	Yes		26 years	Yes	No	No	No	Yes	No	No	No	No	No	No	Yes	No	No	No	Yes	Yes	Yes	No	No	Yes	No	No		No	Yes	No	No	No	No	No	No	Yes	No	No	Yes	No	No	No	No
471	2021-01-20 11:47:29	5	ESPANISH	2021-01-20 11:41:27	2021-01-20 11:47:29	Yes	No		56	No	No	No	Yes	No	Yes	No	No	No	No	Yes	No	No	No	No	Yes	Yes	Yes	No	Yes	Yes	No	No		Yes	Yes	Yes	No	No	No	No	No	Yes	Yes	No	No	No	No	No	Yes
472	2021-01-20 11:49:03	5	ESPANISH	2021-01-20 11:41:49	2021-01-20 11:49:03	No	Yes		20	Yes	No	No	No	Yes	No	No	No	No	No	No	No	No	Yes	No	Yes	Yes	No	Yes	No	No	No	No		No	No	No	No	Yes	No	No	No	No	No	No	Yes	No	No	Yes	No
476	2021-01-20 11:57:32	5	ESPANISH	2021-01-20 11:54:26	2021-01-20 11:57:32	No	Yes		20	Yes	No	No	No	Yes	No	No	No	No	No	No	No	Yes	No	No	Yes	Yes	Yes	No	No	No	No	No		Yes	No	No	No	Yes	No	No	No	No	No	No	Yes	No	No	No	No
477	2021-01-20 12:00:14	5	ESPANISH	2021-01-20 11:56:29	2021-01-20 12:00:14	Yes	No		44	No	No	No	Yes	No	Yes	No	No	Yes	No	No	No	Yes	No	No	Yes	Yes	Yes	No	Yes	No	No	No		Yes	Yes	No	No	Yes	No	No	No	Yes	No	No	Yes	No	No	No	No
478	2021-01-20 12:01:01	5	ESPANISH	2021-01-20 11:56:32	2021-01-20 12:01:01	No	Yes		64	No	No	No	Yes	No	No	Yes	No	Yes	Yes	No	No	No	No	No	Yes	Yes	Yes	Yes	Yes	No	No	No		Yes	Yes	No	Yes	No	No	No	No	No	No	Yes	No	No	No	No	No
480	2021-01-20 12:10:49	5	ESPANISH	2021-01-20 12:05:51	2021-01-20 12:10:49	No	Yes		51	No	No	No	Yes	No	Yes	No	No	Yes	No	No	Yes	No	No	No	No	Yes	Yes	Yes	Yes	No	No	No		Yes	No	Yes	No	No	No	No	No	No	Yes	No	No	No	No	No	No
481	2021-01-20 12:18:43	5	ESPANISH	2021-01-20 12:14:49	2021-01-20 12:18:43	Yes	No		46	No	No	No	Yes	No	Yes	No	No	Yes	No	No	No	Yes	No	No	Yes	Yes	Yes	Yes	No	No	No	No		Yes	Yes	Yes	No	Yes	No	No	No	No	Yes	No	Yes	No	No	No	No
482	2021-01-20 12:23:24	5	ESPANISH	2021-01-20 12:19:08	2021-01-20 12:23:24	No	Yes		21	Yes	No	No	No	Yes	No	No	No	No	No	No	No	Yes	No	No	Yes	Yes	Yes	Yes	No	No	No	No		Yes	No	No	No	Yes	No	No	No	No	No	No	Yes	No	No	No	No
483	2021-01-20 12:46:19	5	ESPANISH	2021-01-20 12:20:24	2021-01-20 12:46:19	No	Yes		29	No	No	No	Yes	No	Yes	No	No	No	No	No	No	No	Yes	No	Yes	Yes	Yes	Yes	Yes	Yes	No	No		Yes	Yes	No	No	No	No	No	No	Yes	Yes	No	Yes	No	No	No	No
484	2021-01-20 12:30:44	5	ESPANISH	2021-01-20 12:26:03	2021-01-20 12:30:44	No	Yes		34	No	No	No	Yes	No	Yes	No	No	Yes	No	No	Yes	No	No	No	Yes	Yes	Yes	Yes	No	No	No	No		Yes	Yes	Yes	No	No	No	No	No	Yes	Yes	No	Yes	No	No	No	No
485	2021-01-20 12:29:17	5	ESPANISH	2021-01-20 12:26:25	2021-01-20 12:29:17	No	Yes		27	No	Yes	No	No	Yes	No	No	No	No	No	No	Yes	No	No	No	Yes	Yes	Yes	No	No	Yes	No	No		Yes	Yes	Yes	No	No	No	No	No	Yes	Yes	No	Yes	No	No	No	No
486	2021-01-20 12:32:45	5	ESPANISH	2021-01-20 12:29:10	2021-01-20 12:32:45	No	Yes		18	Yes	No	No	No	Yes	No	No	No	No	No	No	No	Yes	No	No	Yes	Yes	Yes	No	No	No	No	No		No	Yes	Yes	No	Yes	Yes	No	No	Yes	No	No	Yes	Yes	No	No	Yes
487	2021-01-20 12:37:22	5	ESPANISH	2021-01-20 12:31:22	2021-01-20 12:37:22	No	Yes		Sixty-five.	No	No	Yes	No	Yes	No	No	No	No	Yes	No	No	No	No	No	Yes	Yes	Yes	No	No	No	No	No		No	Yes	Yes	No	No	No	No	No	Yes	Yes	No	No	No	No	No	No
488	2021-01-20 13:17:42	5	ESPANISH	2021-01-20 12:34:16	2021-01-20 13:17:42	No	Yes		36	Yes	No	No	No	Yes	No	No	No	No	No	No	No	No	Yes	No	Yes	Yes	Yes	Yes	No	No	No	No	I do not enter closed places except when buying food in small businesses	No	No	Yes	No	Yes	No	No	No	No	Yes	No	Yes	No	No	No	No
489	2021-01-20 12:45:48	5	ESPANISH	2021-01-20 12:37:07	2021-01-20 12:45:48	Yes	No		38	No	No	No	Yes	Yes	No	No	No	Yes	No	No	No	Yes	No	No	Yes	Yes	Yes	Yes	Yes	No	No	No		Yes	No	No	No	No	No	No	No	No	No	No	Yes	No	No	No	No
491	2021-01-20 12:59:31	5	ESPANISH	2021-01-20 12:50:55	2021-01-20 12:59:31	No	Yes		60	No	No	Yes	No	No	Yes	No	No	No	No	No	Yes	No	No	No	Yes	Yes	Yes	Yes	No	No	No	No		No	No	Yes	No	Yes	Yes	No	No	No	No	No	Yes	No	No	No	No
492	2021-01-20 13:00:20	5	ESPANISH	2021-01-20 12:54:31	2021-01-20 13:00:20	Yes	No		56	No	No	No	Yes	Yes	No	No	No	No	Yes	No	No	No	No	No	Yes	Yes	Yes	No	Yes	No	No	No		Yes	No	No	No	No	No	No	No	No	No	No	Yes	No	No	No	No
493	2021-01-20 13:18:57	5	ESPANISH	2021-01-20 13:01:46	2021-01-20 13:18:57	No	Yes		74	No	No	Yes	No	Yes	No	No	No	No	Yes	No	No	No	No	No	Yes	Yes	Yes	Yes	Yes	No	No	No		No	No	Yes	No	No	No	No	No	No	No	No	No	No	Yes	No	No
494	2021-01-20 13:20:40	5	ESPANISH	2021-01-20 13:10:46	2021-01-20 13:20:40	No	Yes		34	No	Yes	No	No	No	Yes	No	No	No	No	Yes	No	No	No	No	Yes	Yes	Yes	No	No	No	No	No		Yes	Yes	No	No	No	No	No	No	No	Yes	No	Yes	No	No	No	Yes
496	2021-01-20 13:19:13	5	ESPANISH	2021-01-20 13:14:37	2021-01-20 13:19:13	No	Yes		21	Yes	No	No	No	Yes	No	No	No	No	No	No	No	Yes	No	No	Yes	Yes	Yes	Yes	No	No	No	No		No	No	Yes	No	No	No	No	No	No	No	Yes	No	Yes	No	No	Yes
497	2021-01-20 13:21:06	5	ESPANISH	2021-01-20 13:17:51	2021-01-20 13:21:06	No	Yes		34	No	No	No	Yes	Yes	No	No	No	No	No	Yes	No	No	No	No	Yes	Yes	Yes	No	No	No	No	No		Yes	Yes	No	No	No	No	No	No	Yes	No	No	Yes	No	No	No	No
498	2021-01-20 13:27:12	5	ESPANISH	2021-01-20 13:19:53	2021-01-20 13:27:12	Yes	No		18	Yes	No	No	No	Yes	No	No	No	No	No	No	No	Yes	No	No	Yes	Yes	Yes	No	No	No	No	No		No	No	No	No	No	Yes	No	No	No	Yes	No	Yes	No	No	No	No
500	2021-01-20 13:28:46	5	ESPANISH	2021-01-20 13:23:55	2021-01-20 13:28:46	No	Yes		47	No	No	No	Yes	No	Yes	No	No	Yes	No	No	Yes	No	No	No	Yes	Yes	Yes	Yes	Yes	No	No	No		Yes	Yes	No	No	Yes	No	No	No	No	No	No	Yes	No	No	No	Yes
501	2021-01-20 13:39:37	5	ESPANISH	2021-01-20 13:26:43	2021-01-20 13:39:37	No	Yes		64	No	No	No	Yes	No	Yes	No	No	Yes	No	No	Yes	No	No	No	Yes	Yes	Yes	Yes	No	No	No	No	REDUCED TO FAMILY CONTACTS WITH NON COEXISTENTS	Yes	Yes	No	Yes	No	No	No	No	No	No	Yes	No	No	No	No	No
503	2021-01-20 13:44:37	5	ESPANISH	2021-01-20 13:40:56	2021-01-20 13:44:37	No	Yes		23	Yes	No	No	No	Yes	No	No	No	No	No	No	No	Yes	No	No	Yes	Yes	Yes	No	No	No	No	No		No	Yes	Yes	No	Yes	No	No	No	Yes	Yes	No	Yes	Yes	No	No	No
504	2021-01-20 13:53:00	5	ESPANISH	2021-01-20 13:48:16	2021-01-20 13:53:00	No	Yes		19	Yes	No	No	No	Yes	No	No	No	No	No	No	No	Yes	No	No	Yes	Yes	Yes	Yes	No	No	No	No		Yes	No	No	No	Yes	No	No	No	No	No	No	Yes	No	No	Yes	No
505	2021-01-20 13:59:53	5	ESPANISH	2021-01-20 13:56:06	2021-01-20 13:59:53	No	Yes		22	Yes	No	No	No	Yes	No	No	No	No	No	No	Yes	No	No	No	Yes	Yes	Yes	No	Yes	Yes	No	No		Yes	Yes	No	No	No	No	No	Yes	Yes	No	No	No	No	No	No	No
506	2021-01-20 14:07:18	5	ESPANISH	2021-01-20 14:03:07	2021-01-20 14:07:18	No	Yes		twenty-one	Yes	No	No	No	Yes	No	No	No	No	No	No	Yes	No	No	No	Yes	Yes	Yes	No	No	No	No	No		Yes	Yes	Yes	No	No	No	No	No	Yes	Yes	No	Yes	No	No	No	No
509	2021-01-20 15:43:41	5	ESPANISH	2021-01-20 15:39:08	2021-01-20 15:43:41	No	Yes		41	No	No	No	Yes	No	Yes	No	No	Yes	No	No	No	Yes	No	No	Yes	Yes	Yes	Yes	Yes	No	No	No		Yes	Yes	No	No	No	No	No	No	Yes	No	No	Yes	No	No	No	Yes
510	2021-01-20 15:51:36	5	ESPANISH	2021-01-20 15:46:01	2021-01-20 15:51:36	No	Yes		25	Yes	No	No	No	No	Yes	No	No	Yes	No	No	No	No	Yes	No	Yes	Yes	Yes	No	No	No	No	No		Yes	No	Yes	No	Yes	No	No	No	No	No	No	Yes	No	No	No	No
511	2021-01-20 15:50:51	5	ESPANISH	2021-01-20 15:46:26	2021-01-20 15:50:51	Yes	No		22	Yes	No	No	No	Yes	No	No	No	No	No	No	No	Yes	No	No	No	Yes	Yes	No	No	No	No	No		Yes	No	No	No	Yes	No	No	No	No	No	No	Yes	No	No	No	Yes
512	2021-01-20 15:57:01	5	ESPANISH	2021-01-20 15:51:15	2021-01-20 15:57:01	Yes	No		42	No	No	No	Yes	No	Yes	No	No	Yes	No	No	No	Yes	No	No	Yes	Yes	Yes	Yes	Yes	Yes	No	No		Yes	Yes	No	No	No	No	No	No	Yes	No	No	Yes	No	No	No	No
514	2021-01-20 16:31:04	5	ESPANISH	2021-01-20 16:24:59	2021-01-20 16:31:04	No	Yes		45	No	No	Yes	No	Yes	No	No	No	No	Yes	No	No	No	No	No	Yes	Yes	Yes	Yes	Yes	No	No	No		Yes	Yes	No	No	No	No	No	No	Yes	Yes	No	No	No	No	No	Yes
515	2021-01-20 17:08:29	5	ESPANISH	2021-01-20 17:02:09	2021-01-20 17:08:29	No	Yes		60	No	No	No	Yes	No	Yes	No	No	Yes	No	No	No	Yes	No	No	Yes	Yes	Yes	Yes	Yes	No	No	No		Yes	No	No	No	No	No	No	No	No	Yes	No	Yes	No	No	No	No
516	2021-01-20 17:33:50	5	ESPANISH	2021-01-20 17:29:06	2021-01-20 17:33:50	Yes	No		21	Yes	No	No	No	Yes	No	No	No	No	No	No	Yes	No	No	No	Yes	Yes	No	No	No	No	No	No		Yes	No	No	No	No	No	No	No	No	No	No	Yes	Yes	No	No	No
518	2021-01-20 18:28:09	5	ESPANISH	2021-01-20 18:21:01	2021-01-20 18:28:09	No	Yes		32	No	No	Yes	No	No	Yes	No	No	No	No	Yes	No	No	No	No	Yes	Yes	Yes	No	No	No	No	No		Yes	Yes	Yes	No	Yes	Yes	No	No	Yes	Yes	No	Yes	Yes	No	No	No
520	2021-01-20 18:29:39	5	ESPANISH	2021-01-20 18:23:47	2021-01-20 18:29:39	No	Yes		39	No	No	Yes	No	No	Yes	No	No	Yes	No	No	No	No	No	Yes	Yes	Yes	Yes	Yes	Yes	Yes	No	No		Yes	Yes	No	No	No	No	No	Yes	Yes	No	No	No	No	No	Yes	No
521	2021-01-20 18:38:48	5	ESPANISH	2021-01-20 18:34:26	2021-01-20 18:38:48	No	Yes		18	Yes	No	No	No	Yes	No	No	No	No	No	No	Yes	No	No	No	No	Yes	No	Yes	No	No	No	No		Yes	No	Yes	No	Yes	No	No	No	No	No	No	No	No	Yes	No	No
522	2021-01-20 18:49:02	5	ESPANISH	2021-01-20 18:45:10	2021-01-20 18:49:02	Yes	No		26	No	No	No	Yes	Yes	No	No	No	No	No	No	No	Yes	No	No	Yes	Yes	Yes	No	No	No	No	No		Yes	No	Yes	No	No	No	No	No	No	No	No	Yes	Yes	No	No	No
523	2021-01-20 18:51:51	5	ESPANISH	2021-01-20 18:46:24	2021-01-20 18:51:51	No	Yes		24	Yes	No	No	No	Yes	No	No	No	No	No	No	No	No	Yes	No	Yes	No	Yes	No	No	No	No	No		No	Yes	No	No	Yes	No	No	No	No	No	No	No	No	Yes	No	No
524	2021-01-20 19:09:54	5	ESPANISH	2021-01-20 19:02:04	2021-01-20 19:09:54	No	Yes		39	No	No	No	Yes	No	Yes	No	No	Yes	No	No	Yes	No	No	No	Yes	Yes	Yes	Yes	Yes	No	No	No		Yes	No	Yes	No	No	No	No	Yes	No	No	No	Yes	No	No	No	Yes
525	2021-01-20 19:26:40	5	ESPANISH	2021-01-20 19:22:09	2021-01-20 19:26:40	No	Yes		19	Yes	No	No	No	Yes	No	No	No	No	No	No	No	Yes	No	No	No	Yes	Yes	Yes	Yes	No	No	No		Yes	No	No	No	No	No	No	Yes	No	No	No	Yes	Yes	No	No	Yes
526	2021-01-20 19:40:23	5	ESPANISH	2021-01-20 19:35:33	2021-01-20 19:40:23	No	Yes		24	Yes	No	No	No	Yes	No	No	No	No	No	Yes	No	No	No	No	Yes	Yes	Yes	No	No	No	No	No	I go out less	Yes	Yes	No	Yes	Yes	No	No	No	No	No	Yes	Yes	No	No	No	No
527	2021-01-20 19:52:59	5	ESPANISH	2021-01-20 19:41:37	2021-01-20 19:52:59	No	Yes		43	No	No	No	Yes	No	Yes	No	No	Yes	No	No	Yes	No	No	No	Yes	Yes	Yes	Yes	No	No	No	No		Yes	No	Yes	No	No	No	No	No	No	Yes	No	Yes	No	No	No	No
528	2021-01-20 19:56:17	5	ESPANISH	2021-01-20 19:46:59	2021-01-20 19:56:17	No	Yes		60	No	No	Yes	No	No	Yes	No	No	Yes	No	No	No	No	No	Yes	Yes	Yes	Yes	Yes	Yes	Yes	No	No		No	Yes	Yes	No	Yes	No	No	No	Yes	No	No	Yes	No	No	No	No
529	2021-01-20 20:14:22	5	ESPANISH	2021-01-20 19:58:25	2021-01-20 20:14:22	Yes	No		23	No	Yes	No	No	Yes	No	No	No	No	No	No	Yes	No	No	No	No	Yes	Yes	Yes	No	No	No	No		Yes	No	No	No	No	No	No	No	No	No	No	Yes	Yes	No	Yes	No
530	2021-01-20 20:33:30	5	ESPANISH	2021-01-20 20:29:27	2021-01-20 20:33:30	Yes	No		28	Yes	No	No	No	Yes	No	No	No	No	No	Yes	No	No	No	No	Yes	Yes	Yes	Yes	Yes	Yes	No	No		Yes	No	No	No	No	No	No	No	No	No	No	No	No	Yes	No	No
532	2021-01-20 20:44:24	5	ESPANISH	2021-01-20 20:35:29	2021-01-20 20:44:24	No	Yes		20	Yes	No	No	No	Yes	No	No	No	No	No	Yes	No	No	No	No	No	Yes	Yes	No	No	No	No	No		No	No	Yes	No	Yes	Yes	No	No	No	Yes	No	Yes	Yes	No	No	Yes
533	2021-01-20 22:59:31	5	ESPANISH	2021-01-20 22:55:07	2021-01-20 22:59:31	No	Yes		25	No	Yes	No	No	Yes	No	No	No	No	No	Yes	No	No	No	No	Yes	Yes	Yes	No	No	No	No	No		No	Yes	No	No	No	No	No	No	No	No	No	Yes	No	No	No	No
535	2021-01-21 08:58:41	5	ESPANISH	2021-01-21 08:55:19	2021-01-21 08:58:41	Yes	No		21	Yes	No	No	No	Yes	No	No	No	No	No	No	Yes	No	No	No	Yes	Yes	Yes	Yes	Yes	Yes	No	No		Yes	Yes	No	No	No	No	No	No	No	No	No	No	No	Yes	No	No
536	2021-01-21 09:45:47	5	ESPANISH	2021-01-21 09:39:29	2021-01-21 09:45:47	No	Yes		32	No	No	No	Yes	Yes	No	No	No	No	Yes	No	No	No	No	No	Yes	Yes	Yes	No	No	No	No	No		Yes	No	Yes	No	No	No	No	No	Yes	No	No	Yes	No	No	No	No
537	2021-01-21 10:04:18	5	ESPANISH	2021-01-21 09:59:27	2021-01-21 10:04:18	No	Yes		19	Yes	No	No	No	Yes	No	No	No	No	No	No	No	No	No	Yes	Yes	Yes	No	No	No	No	No	No		No	No	Yes	No	No	No	No	No	No	Yes	No	Yes	No	No	No	No
538	2021-01-21 10:21:25	5	ESPANISH	2021-01-21 10:00:30	2021-01-21 10:21:25	No	Yes		37	No	No	No	Yes	No	Yes	No	No	Yes	No	No	No	Yes	No	No	Yes	Yes	Yes	Yes	No	No	No	No	shoe and food disinfection	Yes	Yes	No	Yes	Yes	No	No	No	Yes	No	Yes	Yes	No	No	No	No
539	2021-01-21 10:29:22	5	ESPANISH	2021-01-21 10:24:03	2021-01-21 10:29:22	Yes	No		23	Yes	No	No	No	Yes	No	No	No	No	No	No	Yes	No	No	No	Yes	Yes	Yes	No	No	No	No	No		Yes	Yes	No	No	No	No	No	No	No	Yes	No	Yes	No	No	No	No
540	2021-01-21 10:43:12	5	ESPANISH	2021-01-21 10:37:53	2021-01-21 10:43:12	No	Yes		20	Yes	No	No	No	Yes	No	No	No	No	No	No	No	Yes	No	No	Yes	Yes	Yes	Yes	No	No	No	No		Yes	No	No	No	Yes	Yes	No	No	No	No	No	Yes	No	No	No	No
541	2021-01-21 12:26:27	5	ESPANISH	2021-01-21 12:13:18	2021-01-21 12:26:27	Yes	No		47	No	No	No	Yes	No	Yes	No	No	No	No	Yes	No	No	No	No	Yes	Yes	Yes	No	No	No	No	No		Yes	Yes	Yes	No	Yes	Yes	No	No	Yes	Yes	No	Yes	No	No	No	No
542	2021-01-21 12:23:05	5	ESPANISH	2021-01-21 12:13:57	2021-01-21 12:23:05	No	Yes		30	No	No	No	Yes	Yes	No	No	No	No	Yes	No	No	No	No	No	Yes	Yes	Yes	No	No	No	No	No		Yes	Yes	Yes	No	Yes	No	No	No	Yes	Yes	No	Yes	No	No	No	No
544	2021-01-21 13:58:54	5	ESPANISH	2021-01-21 13:53:58	2021-01-21 13:58:54	No	Yes		19	Yes	No	No	No	Yes	No	No	No	No	No	No	No	Yes	No	No	Yes	Yes	Yes	Yes	No	No	No	No		Yes	No	Yes	No	Yes	Yes	No	No	No	No	No	Yes	No	No	Yes	No
545	2021-01-21 16:10:11	5	ESPANISH	2021-01-21 15:52:57	2021-01-21 16:10:11	No	Yes		25	No	Yes	No	No	Yes	No	No	No	No	No	Yes	No	No	No	No	Yes	Yes	Yes	Yes	No	No	No	No		Yes	No	Yes	No	No	Yes	No	Yes	Yes	Yes	No	Yes	No	No	No	No
546	2021-01-21 16:25:36	5	ESPANISH	2021-01-21 16:19:51	2021-01-21 16:25:36	No	Yes		27	Yes	No	No	No	No	Yes	No	No	Yes	No	Yes	No	No	No	No	Yes	Yes	Yes	Yes	Yes	No	No	No		Yes	Yes	No	Yes	No	No	No	No	No	No	No	No	No	Yes	No	Yes
548	2021-01-21 16:44:35	5	ESPANISH	2021-01-21 16:38:02	2021-01-21 16:44:35	Yes	No		33	No	No	No	Yes	Yes	No	No	No	No	No	Yes	No	No	No	No	Yes	Yes	Yes	Yes	Yes	No	No	No		No	Yes	No	No	No	No	No	No	Yes	No	No	No	No	No	Yes	No
549	2021-01-21 18:10:13	5	ESPANISH	2021-01-21 18:02:16	2021-01-21 18:10:13	No	Yes		54	No	No	No	Yes	No	Yes	No	No	No	No	Yes	No	No	No	No	Yes	Yes	Yes	Yes	Yes	No	No	No		Yes	Yes	Yes	Yes	No	No	No	No	No	No	Yes	No	No	No	No	No
550	2021-01-21 18:11:07	5	ESPANISH	2021-01-21 18:05:36	2021-01-21 18:11:07	No	Yes		42	No	No	No	Yes	No	Yes	No	No	Yes	No	No	No	Yes	No	No	Yes	Yes	Yes	Yes	Yes	No	No	No		Yes	Yes	No	Yes	No	No	No	No	Yes	No	Yes	Yes	No	No	No	No
552	2021-01-21 18:45:21	5	ESPANISH	2021-01-21 18:31:50	2021-01-21 18:45:21	Yes	No		78	No	No	Yes	No	No	Yes	No	No	No	No	Yes	No	No	No	No	Yes	Yes	Yes	Yes	No	No	No	No		No	No	Yes	No	No	No	No	No	Yes	No	No	No	No	No	No	No
553	2021-01-21 18:39:03	5	ESPANISH	2021-01-21 18:33:23	2021-01-21 18:39:03	No	Yes		18	Yes	No	No	No	Yes	No	No	No	No	No	No	No	Yes	No	No	Yes	Yes	No	No	No	No	No	No		Yes	Yes	Yes	No	Yes	Yes	No	No	Yes	Yes	No	Yes	Yes	No	No	No
554	2021-01-21 19:18:47	5	ESPANISH	2021-01-21 19:14:55	2021-01-21 19:18:47	No	Yes		37	No	No	No	Yes	Yes	No	No	No	Yes	No	No	Yes	No	No	No	No	Yes	Yes	Yes	No	No	No	No		Yes	No	No	No	No	No	No	No	Yes	No	No	Yes	No	No	No	No
555	2021-01-21 23:09:59	5	ESPANISH	2021-01-21 23:04:51	2021-01-21 23:09:59	Yes	No		22	Yes	No	No	No	Yes	No	No	No	No	No	No	Yes	No	No	No	Yes	Yes	No	No	No	No	No	No	I avoid meeting people who are different from my environment	Yes	No	No	No	Yes	No	No	No	No	No	No	Yes	No	No	No	No
556	2021-01-22 05:26:29	5	ESPANISH	2021-01-22 05:19:12	2021-01-22 05:26:29	Yes	No		25	Yes	No	No	No	Yes	No	No	No	No	No	No	Yes	No	No	No	Yes	Yes	No	Yes	No	No	No	No		No	No	No	No	No	No	Yes	No	No	No	No	Yes	No	Yes	No	No
557	2021-01-22 09:36:51	5	ESPANISH	2021-01-22 09:30:59	2021-01-22 09:36:51	No	Yes		20	Yes	No	No	No	No	Yes	No	No	No	No	No	No	Yes	No	No	Yes	Yes	Yes	Yes	No	No	No	No		No	Yes	No	No	No	No	No	No	No	No	No	Yes	No	No	No	No
558	2021-01-22 10:34:34	5	ESPANISH	2021-01-22 10:29:10	2021-01-22 10:34:34	No	Yes		41	Yes	No	No	No	No	Yes	No	No	Yes	No	No	No	Yes	No	No	Yes	Yes	Yes	No	Yes	No	No	No		Yes	Yes	No	No	Yes	No	No	No	Yes	Yes	No	Yes	No	No	No	No
560	2021-01-22 11:50:01	5	ESPANISH	2021-01-22 11:44:39	2021-01-22 11:50:01	No	Yes		46	No	No	No	Yes	No	Yes	No	No	Yes	No	No	Yes	No	No	No	Yes	Yes	Yes	Yes	Yes	No	No	No		Yes	No	No	No	No	No	No	No	No	No	No	Yes	No	No	No	No
562	2021-01-22 12:38:46	5	ESPANISH	2021-01-22 12:27:05	2021-01-22 12:38:46	Yes	No		18	Yes	No	No	No	Yes	No	No	No	No	No	No	Yes	No	No	No	Yes	Yes	No	Yes	No	No	No	No		No	Yes	No	No	No	Yes	No	No	Yes	No	No	No	Yes	No	No	No
563	2021-01-22 12:46:43	5	ESPANISH	2021-01-22 12:40:14	2021-01-22 12:46:43	Yes	No		22	No	Yes	No	No	Yes	No	No	No	No	No	No	Yes	No	No	No	Yes	Yes	Yes	No	No	No	No	No		Yes	No	No	No	Yes	No	No	Yes	No	No	No	Yes	No	No	No	No
565	2021-01-22 14:29:48	5	ESPANISH	2021-01-22 14:13:56	2021-01-22 14:29:48	Yes	No		48	No	No	No	Yes	No	Yes	No	No	Yes	No	No	Yes	No	No	No	Yes	Yes	Yes	No	Yes	No	No	No		Yes	No	Yes	No	Yes	No	No	No	No	Yes	No	Yes	No	No	No	No
566	2021-01-22 15:30:18	5	ESPANISH	2021-01-22 15:25:08	2021-01-22 15:30:18	No	Yes		54	No	No	No	Yes	No	Yes	No	No	Yes	No	No	Yes	No	No	No	Yes	Yes	Yes	Yes	Yes	No	No	No		Yes	Yes	No	No	No	No	No	No	No	No	No	Yes	No	No	No	Yes
567	2021-01-22 17:37:26	5	ESPANISH	2021-01-22 17:31:22	2021-01-22 17:37:26	No	Yes		31	Yes	No	No	No	Yes	No	No	No	No	Yes	No	No	No	No	No	Yes	Yes	Yes	No	No	No	No	No		Yes	Yes	Yes	No	No	No	No	Yes	No	No	No	Yes	No	No	No	No
568	2021-01-22 18:50:48	5	ESPANISH	2021-01-22 18:45:42	2021-01-22 18:50:48	Yes	No		21	Yes	No	No	No	Yes	No	No	No	No	No	No	Yes	No	No	No	No	Yes	No	Yes	Yes	No	No	No		No	Yes	Yes	No	No	No	No	No	Yes	Yes	No	No	No	No	No	No
569	2021-01-23 11:45:24	5	ESPANISH	2021-01-23 11:40:57	2021-01-23 11:45:24	No	Yes		18	Yes	No	No	No	Yes	No	No	No	No	No	No	No	Yes	No	No	Yes	Yes	Yes	Yes	Yes	No	No	No		Yes	No	No	No	No	No	No	No	No	No	No	No	No	Yes	No	Yes
570	2021-01-23 15:20:30	5	ESPANISH	2021-01-23 15:13:30	2021-01-23 15:20:30	No	Yes		38	Yes	No	No	No	No	Yes	No	No	Yes	No	No	Yes	No	No	No	Yes	Yes	Yes	Yes	Yes	No	No	No		Yes	Yes	No	No	Yes	No	No	No	No	No	No	Yes	No	No	No	No
571	2021-01-23 17:55:03	5	ESPANISH	2021-01-23 17:50:08	2021-01-23 17:55:03	Yes	No		39	No	No	No	Yes	No	Yes	No	No	No	No	Yes	No	No	No	No	Yes	Yes	Yes	Yes	Yes	No	No	No		No	Yes	No	No	No	No	No	No	No	No	Yes	No	No	No	No	No
572	2021-01-23 17:58:42	5	ESPANISH	2021-01-23 17:54:18	2021-01-23 17:58:42	Yes	No		23	Yes	No	No	No	Yes	No	No	No	No	No	No	Yes	No	No	No	Yes	Yes	Yes	No	No	No	No	No		Yes	Yes	No	No	No	No	No	No	Yes	No	No	No	No	No	No	Yes
573	2021-01-23 21:18:55	5	ESPANISH	2021-01-23 21:13:53	2021-01-23 21:18:55	Yes	No		24	Yes	No	No	No	Yes	No	No	No	No	No	Yes	No	No	No	No	Yes	Yes	No	No	No	No	No	No		No	Yes	Yes	No	Yes	Yes	No	No	No	No	No	Yes	No	No	No	No
577	2021-01-25 17:23:55	5	ESPANISH	2021-01-25 17:18:14	2021-01-25 17:23:55	No	Yes		19	Yes	No	No	No	Yes	No	No	No	No	No	No	No	No	No	Yes	Yes	Yes	Yes	No	No	No	No	No		Yes	No	No	No	No	No	No	No	No	No	No	Yes	No	No	No	No
578	2021-01-25 20:07:42	5	ESPANISH	2021-01-25 19:57:02	2021-01-25 20:07:42	No	Yes		56	No	Yes	No	No	No	Yes	No	No	Yes	No	No	No	No	Yes	No	Yes	Yes	Yes	Yes	Yes	No	No	No		Yes	Yes	No	No	No	No	No	No	Yes	No	No	Yes	Yes	No	No	Yes
579	2021-01-25 22:26:31	5	ESPANISH	2021-01-25 22:21:29	2021-01-25 22:26:31	Yes	No		52	No	No	No	Yes	No	Yes	No	No	Yes	No	No	No	Yes	No	No	Yes	Yes	Yes	No	Yes	No	No	No		Yes	Yes	Yes	Yes	Yes	Yes	No	No	Yes	Yes	Yes	Yes	Yes	No	No	No
581	2021-01-26 09:42:24	5	ESPANISH	2021-01-26 09:32:24	2021-01-26 09:42:24	Yes	No		74	No	No	No	Yes	No	Yes	No	No	No	No	Yes	No	No	No	No	Yes	Yes	Yes	Yes	Yes	No	No	No	I go for a walk with my wife every day	No	No	Yes	No	Yes	No	No	No	No	Yes	No	Yes	No	No	No	No
582	2021-01-26 10:43:25	5	ESPANISH	2021-01-26 10:38:01	2021-01-26 10:43:25	No	Yes		54	No	No	No	Yes	No	No	No	Yes	Yes	No	No	Yes	No	No	No	No	Yes	Yes	Yes	No	No	No	No		Yes	No	Yes	No	No	No	No	No	No	Yes	No	Yes	No	No	No	No
583	2021-01-26 12:03:49	5	ESPANISH	2021-01-26 12:00:49	2021-01-26 12:03:49	No	Yes		29	No	No	No	Yes	Yes	No	No	No	No	No	Yes	No	No	No	No	Yes	Yes	Yes	Yes	No	No	No	No		Yes	Yes	No	No	No	No	No	No	Yes	No	No	Yes	No	No	No	No
584	2021-01-26 12:51:57	5	ESPANISH	2021-01-26 12:39:43	2021-01-26 12:51:57	Yes	No		77	No	No	Yes	No	No	Yes	No	No	No	No	No	No	Yes	No	No	Yes	Yes	Yes	No	Yes	Yes	No	No		No	No	No	No	Yes	No	No	No	No	No	No	Yes	No	No	No	No
587	2021-01-26 18:36:22	5	ESPANISH	2021-01-26 18:30:59	2021-01-26 18:36:22	Yes	No		18	Yes	No	No	No	Yes	No	No	No	No	No	No	No	Yes	No	No	Yes	Yes	Yes	Yes	Yes	No	No	No		Yes	No	No	No	No	No	Yes	No	No	No	No	Yes	No	Yes	Yes	No
588	2021-01-26 21:40:00	5	ESPANISH	2021-01-26 21:34:46	2021-01-26 21:40:00	Yes	No		23	No	Yes	No	No	Yes	No	No	No	No	No	No	No	Yes	No	No	Yes	Yes	No	No	No	No	No	No		Yes	Yes	Yes	No	Yes	No	No	No	No	Yes	No	Yes	No	No	No	No
589	2021-01-27 10:11:26	5	ESPANISH	2021-01-27 10:03:20	2021-01-27 10:11:26	Yes	No		58	No	No	No	Yes	No	Yes	No	No	Yes	No	No	No	Yes	No	No	Yes	Yes	Yes	No	No	No	No	No		Yes	Yes	Yes	No	Yes	No	No	No	Yes	Yes	No	Yes	No	No	No	No
590	2021-01-27 12:45:29	5	ESPANISH	2021-01-27 12:41:32	2021-01-27 12:45:29	No	Yes		22	Yes	No	No	No	Yes	No	No	No	No	No	No	No	Yes	No	No	Yes	Yes	Yes	Yes	No	No	No	No		Yes	No	No	Yes	No	No	No	No	Yes	No	No	Yes	No	No	No	No
591	2021-01-27 22:21:51	5	ESPANISH	2021-01-27 22:17:18	2021-01-27 22:21:51	No	Yes		50	No	No	No	Yes	No	Yes	No	No	Yes	No	No	No	Yes	No	No	Yes	Yes	Yes	Yes	No	No	No	No		Yes	Yes	No	No	No	No	No	No	Yes	Yes	No	Yes	No	No	No	No
593	2021-01-28 16:37:46	5	ESPANISH	2021-01-28 16:32:08	2021-01-28 16:37:46	No	Yes		25	No	Yes	No	No	Yes	No	No	No	No	No	Yes	No	No	No	No	Yes	Yes	Yes	Yes	Yes	Yes	No	No		Yes	Yes	No	No	No	No	No	No	Yes	No	No	Yes	No	No	No	No
594	2021-01-29 10:34:21	5	ESPANISH	2021-01-29 10:28:04	2021-01-29 10:34:21	No	Yes		54	No	No	No	Yes	No	Yes	No	No	No	No	No	Yes	No	No	No	Yes	Yes	Yes	No	Yes	No	No	No		Yes	Yes	Yes	Yes	Yes	No	No	No	Yes	Yes	No	Yes	No	No	No	No
595	2021-01-29 13:03:52	5	ESPANISH	2021-01-29 12:51:46	2021-01-29 13:03:52	Yes	No		41	No	No	No	Yes	No	Yes	No	No	Yes	No	No	No	Yes	No	No	Yes	Yes	Yes	Yes	Yes	No	No	No		Yes	Yes	No	No	Yes	No	No	No	Yes	No	No	Yes	No	No	No	No
596	2021-01-29 18:31:23	5	ESPANISH	2021-01-29 18:20:03	2021-01-29 18:31:23	Yes	No		66	No	No	Yes	No	No	Yes	No	No	No	No	Yes	No	No	No	No	Yes	Yes	Yes	No	No	No	No	No		No	No	Yes	No	Yes	No	No	No	No	Yes	No	Yes	No	No	No	No
597	2021-02-01 09:02:22	5	ESPANISH	2021-02-01 08:55:35	2021-02-01 09:02:22	Yes	No		59	No	No	No	Yes	Yes	No	No	No	No	No	Yes	No	No	No	No	Yes	Yes	Yes	Yes	Yes	No	No	No		Yes	Yes	No	Yes	No	No	No	No	Yes	No	Yes	No	No	No	No	No
599	2021-02-01 10:56:14	5	ESPANISH	2021-02-01 10:51:41	2021-02-01 10:56:14	No	Yes		39	No	No	No	Yes	Yes	No	No	No	No	Yes	No	No	No	No	No	Yes	Yes	Yes	Yes	No	No	No	No		Yes	Yes	Yes	No	Yes	No	No	No	Yes	Yes	No	Yes	No	No	No	No
600	2021-02-01 13:16:25	5	ESPANISH	2021-02-01 13:11:54	2021-02-01 13:16:25	No	Yes		35	No	Yes	No	No	No	No	No	Yes	Yes	No	Yes	No	No	No	No	Yes	Yes	Yes	Yes	Yes	No	No	No		No	Yes	No	Yes	No	No	No	No	Yes	No	Yes	No	No	No	No	Yes
601	2021-02-01 21:33:23	5	ESPANISH	2021-02-01 21:23:36	2021-02-01 21:33:23	No	Yes		63	No	No	Yes	No	No	Yes	No	No	No	No	No	Yes	No	No	No	Yes	Yes	Yes	Yes	No	No	No	No		Yes	Yes	Yes	No	No	No	No	No	No	No	No	No	No	Yes	No	No
603	2021-02-02 20:02:09	5	ESPANISH	2021-02-02 19:57:13	2021-02-02 20:02:09	No	Yes		23	Yes	No	No	No	Yes	No	No	No	No	No	No	No	Yes	No	No	No	Yes	Yes	Yes	No	No	No	No		Yes	No	No	No	No	No	No	No	No	No	No	No	Yes	No	No	Yes
604	2021-02-03 13:45:55	5	ESPANISH	2021-02-03 13:39:25	2021-02-03 13:45:55	Yes	No		23	Yes	No	No	No	Yes	No	No	No	No	No	No	No	Yes	No	No	Yes	Yes	Yes	Yes	No	No	No	No		No	No	Yes	No	Yes	No	No	No	No	Yes	No	Yes	No	No	No	No
605	2021-02-03 19:16:47	5	ESPANISH	2021-02-03 19:07:49	2021-02-03 19:16:47	No	Yes		45	No	No	No	Yes	Yes	No	No	No	No	No	Yes	No	No	No	No	Yes	Yes	Yes	Yes	Yes	No	No	No		Yes	Yes	No	No	Yes	No	No	No	Yes	No	No	Yes	No	No	No	No
606	2021-02-03 22:25:55	5	ESPANISH	2021-02-03 22:10:00	2021-02-03 22:25:55	Yes	No		77	No	No	Yes	No	No	Yes	No	No	No	No	No	Yes	No	No	No	Yes	Yes	Yes	Yes	Yes	Yes	No	No		No	No	No	No	Yes	No	Yes	No	No	No	No	Yes	No	Yes	Yes	No
607	2021-02-04 09:25:17	5	ESPANISH	2021-02-04 09:20:06	2021-02-04 09:25:17	No	Yes		18	Yes	No	No	No	Yes	No	No	No	No	No	No	No	Yes	No	No	Yes	Yes	Yes	Yes	No	No	No	No		Yes	No	No	No	Yes	No	No	No	No	No	No	Yes	No	No	No	No
609	2021-02-04 10:23:24	5	ESPANISH	2021-02-04 10:18:18	2021-02-04 10:23:24	No	Yes		23	Yes	No	No	No	Yes	No	No	No	No	No	No	No	Yes	No	No	Yes	Yes	No	No	No	No	No	No		No	No	Yes	No	Yes	Yes	No	Yes	No	Yes	No	Yes	Yes	No	No	No
610	2021-02-04 12:58:32	5	ESPANISH	2021-02-04 12:52:55	2021-02-04 12:58:32	Yes	No		41	No	No	No	Yes	No	Yes	No	No	Yes	No	No	Yes	No	No	No	Yes	Yes	Yes	Yes	No	No	No	No		Yes	Yes	No	No	No	No	No	No	No	No	No	Yes	Yes	No	No	Yes
612	2021-02-04 15:19:48	5	ESPANISH	2021-02-04 15:11:36	2021-02-04 15:19:48	No	Yes		24	No	Yes	No	No	Yes	No	No	No	No	No	Yes	No	No	No	No	Yes	Yes	Yes	No	Yes	No	No	No		Yes	No	No	No	No	No	No	No	Yes	No	No	No	No	No	No	Yes
615	2021-02-04 17:08:54	5	ESPANISH	2021-02-04 17:02:28	2021-02-04 17:08:54	Yes	No		21	Yes	No	No	No	Yes	No	No	No	No	No	No	No	Yes	No	No	No	Yes	Yes	Yes	Yes	No	No	No		Yes	Yes	No	No	No	No	No	No	No	No	No	No	No	Yes	No	No
616	2021-02-04 21:10:41	5	ESPANISH	2021-02-04 21:03:57	2021-02-04 21:10:41	Yes	No		52	No	No	No	Yes	No	Yes	No	No	No	No	Yes	No	No	No	No	No	Yes	Yes	No	No	No	No	No		Yes	Yes	No	No	No	No	No	No	Yes	Yes	No	Yes	No	No	No	No
617	2021-02-04 22:45:57	5	ESPANISH	2021-02-04 22:33:51	2021-02-04 22:45:57	No	Yes		24	Yes	No	No	No	Yes	No	No	No	No	No	No	Yes	No	No	No	Yes	Yes	Yes	Yes	No	No	No	No	I only stay with cohabitants and partner.	Yes	Yes	No	No	No	No	No	No	Yes	No	No	No	No	No	No	No
618	2021-02-05 07:23:24	5	ESPANISH	2021-02-05 07:17:25	2021-02-05 07:23:24	Yes	No		42	No	No	No	Yes	No	Yes	No	No	Yes	No	No	No	Yes	No	No	Yes	Yes	Yes	No	Yes	No	No	No		Yes	No	No	No	Yes	No	No	No	Yes	No	No	Yes	No	No	No	No
619	2021-02-05 08:23:56	5	ESPANISH	2021-02-05 08:19:42	2021-02-05 08:23:56	Yes	No		27	No	No	No	Yes	Yes	No	No	No	No	Yes	No	No	No	No	No	Yes	Yes	No	No	No	No	No	No		Yes	Yes	Yes	No	Yes	No	No	No	Yes	Yes	No	Yes	Yes	No	No	No
620	2021-02-05 15:09:51	5	ESPANISH	2021-02-05 15:02:32	2021-02-05 15:09:51	No	Yes		50	No	No	No	Yes	No	Yes	No	No	Yes	No	No	Yes	No	No	No	No	Yes	Yes	Yes	Yes	No	No	No		Yes	Yes	No	Yes	No	No	No	No	No	No	No	No	No	Yes	Yes	No
621	2021-02-05 19:37:28	5	ESPANISH	2021-02-05 19:30:54	2021-02-05 19:37:28	No	Yes		54	No	No	No	Yes	No	Yes	No	No	No	No	Yes	No	No	No	No	Yes	Yes	Yes	No	Yes	No	No	No		Yes	No	Yes	No	No	No	No	No	No	No	No	No	No	Yes	No	No
622	2021-02-08 20:17:39	5	ESPANISH	2021-02-08 20:02:35	2021-02-08 20:17:39	Yes	No		63	No	No	Yes	No	No	Yes	No	No	No	No	Yes	No	No	No	No	Yes	Yes	Yes	Yes	No	No	No	No	limit contact with friends	No	No	Yes	No	No	Yes	No	No	No	No	No	Yes	No	No	No	No
623	2021-02-15 09:10:28	5	ESPANISH	2021-02-15 09:05:06	2021-02-15 09:10:28	No	Yes		24	No	No	No	Yes	Yes	No	No	No	No	No	No	No	Yes	No	No	Yes	Yes	Yes	No	No	No	No	No		Yes	Yes	No	No	No	No	No	No	No	Yes	No	Yes	Yes	No	No	Yes
624	2021-02-15 19:03:10	5	ESPANISH	2021-02-15 18:59:03	2021-02-15 19:03:10	No	Yes		46	No	No	No	Yes	No	Yes	No	No	No	No	Yes	No	No	No	No	Yes	Yes	Yes	Yes	Yes	No	No	No		Yes	Yes	No	No	No	No	No	No	No	No	No	Yes	No	No	No	No
625	2021-02-15 22:03:05	5	ESPANISH	2021-02-15 22:00:01	2021-02-15 22:03:05	Yes	No		24	No	Yes	No	No	Yes	No	No	No	No	No	No	No	Yes	No	No	Yes	Yes	Yes	No	No	No	No	No		Yes	No	No	No	Yes	No	No	No	No	No	No	Yes	No	No	No	Yes
626	2021-02-16 16:07:53	5	ESPANISH	2021-02-16 16:05:22	2021-02-16 16:07:53	Yes	No		38	No	No	No	Yes	Yes	No	No	No	No	Yes	No	No	No	No	No	Yes	Yes	Yes	Yes	Yes	No	No	No		Yes	Yes	Yes	No	Yes	No	No	No	Yes	No	No	Yes	No	No	No	No
627	2021-02-16 17:36:05	5	ESPANISH	2021-02-16 17:25:27	2021-02-16 17:36:05	No	Yes		22	Yes	No	No	No	Yes	No	No	No	No	No	Yes	No	No	No	No	Yes	Yes	Yes	Yes	Yes	No	No	No		No	No	No	No	Yes	No	Yes	No	No	No	No	Yes	No	Yes	No	No
628	2021-02-17 10:59:10	5	ESPANISH	2021-02-17 10:54:58	2021-02-17 10:59:10	Yes	No		25	No	Yes	No	No	Yes	No	No	No	No	No	No	No	Yes	No	No	Yes	Yes	No	No	Yes	No	No	No		Yes	Yes	No	No	Yes	No	No	No	No	No	No	Yes	No	No	No	No
629	2021-02-17 11:21:43	5	ESPANISH	2021-02-17 11:09:55	2021-02-17 11:21:43	Yes	No		24	No	Yes	No	No	Yes	No	No	No	No	No	Yes	No	No	No	No	Yes	Yes	No	Yes	No	No	No	No		No	Yes	No	No	Yes	No	No	No	No	No	No	Yes	No	No	No	No
630	2021-02-17 16:24:29	5	ESPANISH	2021-02-17 16:19:24	2021-02-17 16:24:29	Yes	No		24	No	Yes	No	No	Yes	No	No	No	No	Yes	No	No	No	No	No	Yes	Yes	Yes	No	No	No	No	No		Yes	Yes	No	No	No	No	No	Yes	Yes	No	No	Yes	No	No	No	No
631	2021-02-18 12:54:09	5	ESPANISH	2021-02-18 12:47:50	2021-02-18 12:54:09	No	Yes		38	No	No	No	Yes	No	Yes	No	No	No	No	Yes	No	No	No	No	Yes	Yes	Yes	No	No	No	No	No		Yes	Yes	No	No	No	No	No	No	Yes	No	No	Yes	No	No	No	No
[truncated: 125 more columns]
